# Supplementary material for: Brief communication: Getting Greenland's glaciers right – a new data set of all official Greenlandic glacier names
Source: Copernicus journal article supplement (doi:10.5194/tc-9-2215-2015), 2015-12-01
Supplement: Supplementary file 1 [file GreenlandGlacierNames_GGNv01.xlsx]

## Sheet: Sheet1
ID	LAT	LON	New Greenlandic name	Old Greenlandic name	Foreign name	Official name	Alternative names	RGI_ID	GLIMS_ID	RGI_CEN_LON	RGI_CEN_LAT	Type
GGN0001	60.1166	-43.37	Sermeq Kujalleq	Sermeq Kujatdleq		Sermeq Kujalleq		RGI40-05.04361	G316578E60159N	-43.4217	60.1593	LGIC
GGN0002	60.1349	-43.5125	Sermeq Avannarleq	Sermeq Avangnardleq		Sermeq Avannarleq		RGI40-05.04363	G316482E60158N	-43.5182	60.1584	LGIC
GGN0003	60.1627	-43.7278	Sermikasik Avannarleq	Sermikasik Avangnardleq		Sermikasik Avannarleq		RGI40-05.04356	G316285E60178N	-43.7154	60.1779	LGIC
GGN0004	60.1639	-43.7038	Sermikasik Kujalleq	Sermikasik Kujatdleq		Sermikasik Kujalleq		RGI40-05.04356	G316285E60178N	-43.7154	60.1779	LGIC
GGN0005	60.2171	-43.337	Sermeq Avannarleq	Sermeq Avangnardleq		Sermeq Avannarleq		RGI40-05.04332	G316577E60220N	-43.4229	60.2199	LGIC
GGN0006	60.2352	-43.2644	Sermeq Qeqqarleq	Sermeq Qerqardleq		Sermeq Qeqqarleq		RGI40-05.04331	G316702E60261N	-43.298	60.2613	LGIC
GGN0007	60.2505	-43.2445	Sermeq Kujalleq	Sermeq Kujatdleq		Sermeq Kujalleq		RGI40-05.04331	G316702E60261N	-43.298	60.2613	LGIC
GGN0008	60.3098	-43.948	Paarliit Sermiat			Paarliit Sermiat	Paarliit Sermia	RGI40-05.04309	G316193E60315N	-43.8066	60.3151	LGIC
GGN0009	60.3114	-45.2736			Napasorsuaq Gletsjer	Napasorsuaq Gletsjer		RGI40-05.03779	G314725E60307N	-45.2749	60.3074	LGIC
GGN0010	60.3479	-44.1093	Sermikasik			Sermikasik		RGI40-05.03889	G315849E60344N	-44.1513	60.3436	LGIC
GGN0011	60.4097	-44.1272	Qinngorliit Sermiat			Qinngorliit Sermiat	Qinngerliit Sermiat	RGI40-05.04288	G315830E60462N	-44.1699	60.4622	LGIC
GGN0012	60.5319	-44.4256	Sermitsiaq	Sermitsiaq		Sermitsiaq		RGI40-05.04052	G315652E60546N	-44.3482	60.5455	LGIC
GGN0013	60.5686	-44.4636	Sermersuasik			Sermersuasik		RGI40-05.04143	G315572E60586N	-44.4281	60.5864	LGIC
GGN0014	60.7022	-45.2375	Sermitsiaq Killeq	Sermitsiaq Kitdleq		Sermitsiaq Killeq		RGI40-05.04402	G314767E60701N	-45.2333	60.7008	LGIC
GGN0015	60.7165	-45.207	Sermitsiaq Kangilleq	Sermitsiaq Kangigdleq		Sermitsiaq Kangilleq		RGI40-05.04310	G314796E60715N	-45.2044	60.7145	LGIC
GGN0016	60.7977	-44.4902	Sermeq	Sermeq		Sermeq						GrIS
GGN0017	60.8598	-44.8764	Siorallip Sermia	Sioragdlip Sermia		Siorallip Sermia						GrIS
GGN0018	60.9667	-44.9167	Sermeq Kangilleq	Sermeq Kangigdleq		Sermeq Kangilleq						GrIS
GGN0019	60.9833	-45.0167			Jespersen Bræ	Jespersen Bræ						GrIS
GGN0020	60.9845	-46.9863	Sermilik		Sermilik Bræ	Sermilik						GrIS
GGN0021	60.9938	-45.9079			Narsaq Bræ	Narsaq Bræ		RGI40-05.04721	G314094E60995N	-45.9058	60.9954	LGIC
GGN0022	61.0088	-46.686	Qalerallit Sermiat	Qaleragdlit Sermiat		Qalerallit Sermiat						GrIS
GGN0023	61.0373	-46.5812	Naajat Sermiat	Naujat Sermiat		Naajat Sermiat						GrIS
GGN0024	61.05	-47.6667			Nordre Qipisaqqu Bræ	Nordre Qipisaqqu Bræ						GrIS
GGN0025	61.05	-47.5			Søndre Qipisaqqu Bræ	Søndre Qipisaqqu Bræ						GrIS
GGN0026	61.09	-46.4184	Ilorliit	Ilordlît		Ilorliit						GrIS
GGN0027	61.095	-46.3171	Serminnguaq	Sermínguaq		Serminnguaq						GrIS
GGN0028	61.1452	-47.7424			Søndre Qoornoq Bræ	Søndre Qoornoq Bræ						GrIS
GGN0029	61.1912	-47.7181			Nordre Qoornoq Bræ	Nordre Qoornoq Bræ						GrIS
GGN0030	61.2149	-48.4512			Storebræ	Storebræ		RGI40-05.04997	G311549E61209N	-48.4511	61.2091	LGIC
GGN0031	61.2157	-48.4309			Nordre Hængebræ	Nordre Hængebræ		RGI40-05.04989	G311571E61214N	-48.4286	61.2144	LGIC
GGN0032	61.2667	-45.2667	Kiattuut Sermiat	Kiagtût Sermiat		Kiattuut Sermiat						GrIS
GGN0033	61.2765	-46.1501	Eqalorutsit Killiit Sermiat	Eqalorutsit Kitdlît Sermiat		Eqalorutsit Killiit Sermiat						GrIS
GGN0034	61.2966	-44.9608			Sydtunge	Sydtunge						GrIS
GGN0035	61.2986	-44.7999			Tretungegletsjer	Tretungegletsjer						GrIS
GGN0036	61.3107	-47.8693	Sermeq	Sermeq	Arsuk Bræ	Sermeq						GrIS
GGN0037	61.3123	-44.9964			Nordtunge	Nordtunge						GrIS
GGN0038	61.3457	-44.9839	Qooqqup Sermia	Qôrqup Sermia		Qooqqup Sermia						GrIS
GGN0039	61.3517	-47.8065			Sortisen	Sortisen						GrIS
GGN0040	61.3662	-45.1586			Sydgletsjer	Sydgletsjer						GrIS
GGN0041	61.3753	-45.7318	Eqalorutsit Kangilliit Sermiat	Eqalorutsit Kangigdlît Sermiat		Eqalorutsit Kangilliit Sermiat						GrIS
GGN0042	61.4333	-45.4			Nordbogletsjer	Nordbogletsjer						GrIS
GGN0043	61.4558	-44.9518			Østgletsjer	Østgletsjer						GrIS
GGN0044	61.478	-45.1564			Nordgletsjer	Nordgletsjer						GrIS
GGN0045	61.5198	-47.9697			Sioralik Bræ	Sioralik Bræ						GrIS
GGN0046	61.6377	-48.1399	Sermiligaarsuup Sermia		Sermiligaarsuk Bræ	Sermiligaarsuup Sermia						GrIS
GGN0047	61.9667	-48.6333	Uukkaasorsuaq	Ùkâssorssuaq	Sermilik Bræ	Uukkaasorsuaq						GrIS
GGN0048	62.0795	-48.7666			Nigerlikasik Bræ	Nigerlikasik Bræ						GrIS
GGN0049	62.1954	-48.8274			Akulleq Bræ	Akulleq Bræ						GrIS
GGN0050	62.2	-42.35	Sikuijivittip Apusiia	Sikuijivítip Apusîa		Sikuijivittip Apusiia						GrIS
GGN0051	62.222	-48.9731			Avannarleq Bræ	Avannarleq Bræ						GrIS
GGN0052	62.5571	-49.8911	Sioqqap Sermia		Frederikshåb Isblink	Sioqqap Sermia						GrIS
GGN0053	62.9052	-42.6851			Heimdal Gletsjer	Heimdal Gletsjer						GrIS
GGN0054	63.0556	-42.3807			Garm	Garm		RGI40-05.06021	G317519E63061N	-42.4809	63.0607	LGIC
GGN0055	63.0659	-49.5848	Nakkaasorsuaq	Nákâssorssuaq		Nakkaasorsuaq	Allumersat Qinnguata Sermia					GrIS
GGN0056	63.1833	-41.5833	Apusiigajik	Apusîkajik		Apusiigajik		RGI40-05.06236	G318388E63185N	-41.6125	63.1849	LGIC
GGN0057	63.2216	-42.5455			Guldfaxe	Guldfaxe						GrIS
GGN0058	63.2899	-41.4678			Bjarke Gletsjer	Bjarke Gletsjer		RGI40-05.06305	G318528E63295N	-41.4722	63.2953	LGIC
GGN0059	63.2926	-41.9168	Apusiigajik	Apusîkajik	Skinfaxe	Apusiigajik	Apusiikajik; Apusiigai					GrIS
GGN0060	63.305	-42.3669			Rimfaxe	Rimfaxe						GrIS
GGN0061	63.3056	-41.2961			Hjalte Gletsjer	Hjalte Gletsjer		RGI40-05.06324	G318697E63308N	-41.3032	63.3084	LGIC
GGN0062	63.3086	-41.2467	Apusiigajik	Apusîkajik		Apusiigajik		RGI40-05.06320	G318744E63310N	-41.256	63.3101	LGIC
GGN0063	63.3255	-42.2718			Ygdrasil	Ygdrasil		RGI40-05.06267	G317703E63336N	-42.2975	63.3356	LGIC
GGN0064	63.3304	-42.1594			Tjasse Gletsjer	Tjasse Gletsjer						GrIS
GGN0065	63.3342	-40.7008	Apusiigajik	Apusîkajik		Apusiigajik		RGI40-05.06412	G318850E63397N	-41.1505	63.3966	LGIC
GGN0066	63.3351	-41.5076			Vigge Gletsjer	Vigge Gletsjer		RGI40-05.06401	G318483E63335N	-41.5175	63.3349	LGIC
GGN0067	63.3714	-41.5263	Qoornersaata Apuseertakajaa	Qôrnersâta Apusêrtakajâ	Njord Gletsjer	Qoornersaata Apuseertakajaa		RGI40-05.06394	G318464E63372N	-41.5364	63.3718	LGIC
GGN0068	63.3833	-41.7167	Apuseerajik	Apusêrajik		Apuseerajik		RGI40-05.06423	G318284E63395N	-41.7162	63.3945	LGIC
GGN0069	63.431	-41.9608	Kattilersarpik	Kagtilersarpik	Rumleren	Kattilersarpik	Apuseerngai					GrIS
GGN0070	63.454	-41.9659	Singiiaaleqaaq	Singîâleqaoq		Singiiaaleqaaq	Tingiaaleraar	RGI40-05.06466	G318031E63454N	-41.9687	63.4536	LGIC
GGN0071	63.4589	-41.815	Miialeqaaq	Mîaleqaoq		Miialeqaaq		RGI40-05.06485	G318182E63459N	-41.8182	63.4586	LGIC
GGN0072	63.4596	-41.7496	Apusiigajik	Apusîkajik	Skjoldmøen	Apusiigajik	Apusiikajik; Apusiigai	RGI40-05.06486	G318253E63432N	-41.7475	63.432	LGIC
GGN0073	63.5429	-41.9912			Thrym Gletsjer	Thrym Gletsjer						GrIS
GGN0074	63.5576	-50.3999	Sermeq	Sermeq		Sermeq						GrIS
GGN0075	63.5832	-41.2358			Sigyn Gletsjer	Sigyn Gletsjer		RGI40-05.06803	G318726E63593N	-41.2741	63.5928	LGIC
GGN0076	63.5869	-41.6251			Storehund	Storehund						GrIS
GGN0077	63.6081	-41.7483			Jomfruen	Jomfruen						GrIS
GGN0078	63.6138	-41.5521			Lossen	Lossen						GrIS
GGN0079	63.6407	-41.4878			Skorpionen	Skorpionen						GrIS
GGN0080	63.6415	-41.1585			Tjalfe Gletsjer	Tjalfe Gletsjer		RGI40-05.06796	G318852E63633N	-41.1476	63.6333	LGIC
GGN0081	63.6454	-41.0531			Røskva Gletsjer	Røskva Gletsjer		RGI40-05.06799	G318955E63641N	-41.0454	63.6406	LGIC
GGN0082	63.6912	-41.8681			Mælkevejen	Mælkevejen						GrIS
GGN0083	63.7046	-40.7387			Gymer Gletsjer	Gymer Gletsjer		RGI40-05.07003	G319232E63744N	-40.7676	63.7444	LGIC
GGN0084	63.7051	-40.879			Gerd Gletsjer	Gerd Gletsjer		RGI40-05.07005	G319028E63741N	-40.9721	63.7405	LGIC
GGN0085	63.7167	-41.65			Storebjørn	Storebjørn						GrIS
GGN0086	63.7247	-40.9773			Ydun Gletsjer	Ydun Gletsjer		RGI40-05.07005	G319028E63741N	-40.9721	63.7405	LGIC
GGN0087	63.8095	-40.6769			Gjallerbroen	Gjallerbroen		RGI40-05.07011	G319268E63812N	-40.7324	63.8117	LGIC
GGN0088	63.8797	-40.7282			Gungner	Gungner		RGI40-05.07168	G319152E63854N	-40.8482	63.8536	LGIC
GGN0089	63.8846	-41.7654			A.P. Bernstorff Gletsjer	A.P. Bernstorff Gletsjer						GrIS
GGN0090	63.9	-41.3333			Sleipner	Sleipner						GrIS
GGN0091	63.9502	-41.5146			Fimbulgletsjer	Fimbulgletsjer						GrIS
GGN0092	64.1159	-40.607	Qapiarpik	Qapiarpik		Qapiarpik	Qapiarpi	RGI40-05.07193	G319241E64087N	-40.7588	64.0868	LGIC
GGN0093	64.15	-49.75	Kangaasarsuup Sermia	Kangaussarssûp Sermia		Kangaasarsuup Sermia						GrIS
GGN0094	64.2966	-49.6102	Kangiata Nunaata Sermia	Kangiata nunâta Sermia		Kangiata Nunaata Sermia						GrIS
GGN0095	64.35	-41.5667			Gråulv	Gråulv						GrIS
GGN0096	64.363	-40.9308	Apuseerserpia	Apusêrserpia		Apuseerserpia						GrIS
GGN0097	64.3833	-49.4779	Akullersuup Sermia	Akugdlerssûp Sermia		Akullersuup Sermia						GrIS
GGN0098	64.3981	-40.6551	Puisertoq	Puisertoq		Puisertoq						GrIS
GGN0099	64.4049	-51.1232	Sermikasik			Sermikasik		RGI40-05.07469	G308910E64399N	-51.0902	64.3989	LGIC
GGN0100	64.462	-40.2057	Kangerup Apusiia	Kangerup Apusîa		Kangerup Apusiia	Kangi Apusiia	RGI40-05.07490	G319659E64488N	-40.3412	64.4882	LGIC
GGN0101	64.4872	-49.5064	Qamanaarsuup Sermia	Qamanârssûp Sermia		Qamanaarsuup Sermia						GrIS
GGN0102	64.6672	-49.8576	Narsap Sermia	Narssap Sermia		Narsap Sermia						GrIS
GGN0103	64.8667	-49.9	Kangilinnguata Sermia	Kangilínguata Sermia		Kangilinnguata Sermia						GrIS
GGN0104	65.0731	-40.1955	Apuseeq	Apusêq		Apuseeq						GrIS
GGN0105	65.2869	-50.4289	Saqqap Sermia	Sarqap Sermia		Saqqap Sermia						GrIS
GGN0106	65.3167	-51.8333	Sermeralak	Sermeralak		Sermeralak		RGI40-05.00035	G308167E65307N	-51.8327	65.3069	LGIC
GGN0107	65.6142	-52.4541	Sermeralak Killeq			Sermeralak Killeq		RGI40-05.00340	G307572E65613N	-52.4281	65.6132	LGIC
GGN0108	65.628	-38.7084	Nattivit Apusiiat	Apusêrsêrpia		Nattivit Apusiiat	Apuseerseerpia; Naddivid Apusiiad; Apuseer					GrIS
GGN0109	65.6288	-52.0853	Qapiarfiup Sermia	Qapiarfiup Sermia		Qapiarfiup Sermia		RGI40-05.00115	G307874E65600N	-52.1262	65.6	LGIC
GGN0110	65.6326	-52.6537	Sermeralak			Sermeralak		RGI40-05.00111	G307352E65626N	-52.6485	65.6259	LGIC
GGN0111	65.6472	-37.0777	Apusiaajik	Apusiâjik		Apusiaajik	Apusiaai	RGI40-05.11158	G322948E65651N	-37.0525	65.6512	LGIC
GGN0112	65.649	-52.4373	Sermeralak Kangilleq			Sermeralak Kangilleq		RGI40-05.00355	G307607E65641N	-52.3931	65.641	LGIC
GGN0113	65.6551	-36.9815	Apusiaajik Kiatteq	Apusiâjik		Apusiaajik Kiatteq	Apusiaajik; Apusiaai Kiadder	RGI40-05.11117	G323016E65653N	-36.9839	65.6528	LGIC
GGN0114	65.6632	-51.5568	Aappilanileralak			Aappilanileralak		RGI40-05.00086	G308448E65663N	-51.5517	65.6631	LGIC
GGN0115	65.7035	-38.7412			Bussemandgletsjer	Bussemandgletsjer						GrIS
GGN0116	65.7333	-37	Apuseeq	Apusêq		Apuseeq		RGI40-05.11219	G322988E65738N	-37.0124	65.7379	LGIC
GGN0117	65.8009	-38.2236	Apuseerajik Anngittumanngitteq		Hobbs Gletsjer	Apuseerajik Anngittumanngitteq	Apuseerngai anngitsumanngitser	RGI40-05.11225	G321802E65782N	-38.1978	65.7822	LGIC
GGN0118	65.8609	-36.2318	Apuseertaa	Apusêrtâ		Apuseertaa		RGI40-05.11354	G323767E65862N	-36.2328	65.8616	LGIC
GGN0119	65.863	-52.5227	Sermeralak			Sermeralak		RGI40-05.00268	G307470E65859N	-52.53	65.8591	LGIC
GGN0120	65.8673	-38.377	Apuseerajik	Apusêrajik	Hann Gletsjer	Apuseerajik	Apuseerngai	RGI40-05.11257	G321575E65856N	-38.4249	65.8555	LGIC
GGN0121	65.8757	-37.4039			Dobbeltbræen	Dobbeltbræen		RGI40-05.11365	G322578E65882N	-37.4224	65.8822	LGIC
GGN0122	65.9167	-36.55	Apusiiaajik	Apusiâjik		Apusiiaajik	Apusiaajik; Apusiaai	RGI40-05.11398	G323454E65915N	-36.5459	65.9145	LGIC
GGN0123	65.9268	-36.5802	Apusiigajik	Apusîgajik		Apusiigajik	Apusiikajik; Apusiigai	RGI40-05.11414	G323425E65926N	-36.5755	65.9258	LGIC
GGN0124	65.9281	-52.4308	Sermitsiaq Kangilleq			Sermitsiaq Kangilleq		RGI40-05.00828	G307587E65935N	-52.4135	65.9352	LGIC
GGN0125	65.9333	-51.8	Aalasaama	Aulasâma		Aalasaama		RGI40-05.00314	G308176E65918N	-51.8245	65.9176	LGIC
GGN0126	65.9357	-38.4601	Kangertivala Apusiiala Qeqqarterpaartaa	Apusêrajik	Brückner Gletsjer	Kangertivala Apusiiala Qeqqarterpaartaa	Apuseerajik; Kangertsivala Apusiiala Qeqqartserpaartaa					GrIS
GGN0127	65.9447	-37.4422	Apuseerajik	Apusêrajik		Apuseerajik	Apuseerngai	RGI40-05.11359	G322551E65918N	-37.4493	65.918	LGIC
GGN0128	65.9613	-52.0721	Inorersut Sermiat			Inorersut Sermiat		RGI40-05.00310	G307955E65949N	-52.0451	65.9493	LGIC
GGN0129	65.9632	-52.2621	Taateraatsiaat Sermiat	Tâterâtsiait Sermiat		Taateraatsiaat Sermiat	Taateraat Sermiat Killeq	RGI40-05.00818	G307687E65965N	-52.3135	65.9645	LGIC
GGN0130	65.9649	-52.5623	Sisuugussiviup Sermia	Sisûgússiviup Sermia		Sisuugussiviup Sermia		RGI40-05.00303	G307450E65956N	-52.5504	65.9562	LGIC
GGN0131	65.9667	-52.5	Sermitaq Ammalortoq	Sermitaq Angmalortoq		Sermitaq Ammalortoq		RGI40-05.00839	G307519E65964N	-52.4809	65.9642	LGIC
GGN0132	65.9833	-52.3	Itillineq	Itivdlineq		Itillineq		RGI40-05.00818	G307687E65965N	-52.3135	65.9645	LGIC
GGN0133	65.9866	-38.4496	Kangertsivala Apusiia		Heim Gletsjer	Kangertsivala Apusiia						GrIS
GGN0134	65.9906	-51.8946	Tapa	Tapa		Tapa		RGI40-05.00304	G308045E65929N	-51.955	65.9293	LGIC
GGN0135	66.0053	-52.4531	Taateraat Sermiat	Tâterât Sermiat		Taateraat Sermiat		RGI40-05.00800	G307859E66095N	-52.141	66.0945	LGIC
GGN0136	66.0096	-38.3644	Kattilertarpia	Kagtilersorpia		Kattilertarpia	Kattilersorpia; Kaddilertsarpia					GrIS
GGN0137	66.0121	-36.0128	Apuseeq	Apusineq		Apuseeq	Apusineq	RGI40-05.13934	G323982E66014N	-36.0178	66.0135	LGIC
GGN0138	66.0152	-52.9947	Sermeralak	Sermeralak		Sermeralak	Sermeralaa	RGI40-05.00854	G307077E66077N	-52.9229	66.0765	LGIC
GGN0139	66.0167	-52.2	Taateraatsiaat Sermiat	Tâterâtsiait Sermiat		Taateraatsiaat Sermiat	Taateraat Sermiat Kangilleq	RGI40-05.00798	G307793E66027N	-52.2069	66.027	LGIC
GGN0140	66.0167	-52.8167	Sermitsiaq	Sermitsiaq		Sermitsiaq		RGI40-05.00817	G307554E66152N	-52.4459	66.1519	LGIC
GGN0141	66.0372	-52.0595	Salliarusiarsuit Sermiat	Sagdliarusiarssuit Sermiat		Salliarusiarsuit Sermiat		RGI40-05.00824	G307940E66043N	-52.0602	66.043	LGIC
GGN0142	66.0469	-36.3188	Apuseerajik	Apusêrajik		Apuseerajik	Apuseerngaiid	RGI40-05.11639	G323695E66046N	-36.3047	66.0463	LGIC
GGN0143	66.0493	-52.4829	Avannarliup Sermia	Avangnardliup Sermia		Avannarliup Sermia		RGI40-05.00831	G307600E66099N	-52.4	66.0993	LGIC
GGN0144	66.05	-52	Salliarutsit Sermiat	Sagdliarutsit Sermiat		Salliarutsit Sermiat		RGI40-05.00822	G308004E66062N	-51.9958	66.0617	LGIC
GGN0145	66.0607	-51.9042	Ippattaq	Ípagtaq		Ippattaq		RGI40-05.00821	G308098E66060N	-51.902	66.0597	LGIC
GGN0146	66.0699	-51.8629	Nakkarajooq	Nákarajôq		Nakkarajooq		RGI40-05.00814	G308093E66087N	-51.907	66.0874	LGIC
GGN0147	66.0851	-36.028			Stephan Gletsjer	Stephan Gletsjer		RGI40-05.13886	G323938E66079N	-36.0625	66.0791	LGIC
GGN0148	66.1124	-36.7589			Kaarali Gletsjer	Kaarali Gletsjer		RGI40-05.13930	G323201E66153N	-36.7987	66.1529	LGIC
GGN0149	66.1302	-53.013			Fagerbræ	Fagerbræ		RGI40-05.00846	G307026E66114N	-52.9745	66.1143	LGIC
GGN0150	66.1324	-36.1343			Idrac Gletsjer	Idrac Gletsjer		RGI40-05.13995	G323748E66257N	-36.2521	66.2572	LGIC
GGN0151	66.1833	-51.1667			Quantum Gletsjer	Quantum Gletsjer		RGI40-05.00445	G308765E66141N	-51.2355	66.1414	LGIC
GGN0152	66.1833	-52.85			Dybe Rende	Dybe Rende		RGI40-05.00845	G307222E66172N	-52.7775	66.1717	LGIC
GGN0153	66.187	-38.0714	Apuseerajik	Apusêrajik		Apuseerajik	Apuseerngai					GrIS
GGN0154	66.2101	-36.2211	Apuseeq	Apusêq	Knud Rasmussen Gletsjer	Apuseeq		RGI40-05.13995	G323748E66257N	-36.2521	66.2572	LGIC
GGN0155	66.2183	-52.7259			Lyngbræ	Lyngbræ		RGI40-05.00809	G307316E66184N	-52.6841	66.1836	LGIC
GGN0156	66.2667	-51.3833			Tasersiaq Gletsjer	Tasersiaq Gletsjer		RGI40-05.00794	G308453E66278N	-51.5466	66.2781	LGIC
GGN0157	66.2667	-52.6333			Vimmelskaftet	Vimmelskaftet		RGI40-05.00844	G307452E66239N	-52.5484	66.2389	LGIC
GGN0158	66.3002	-36.7423			16. September Gletsjer	16. September Gletsjer		RGI40-05.13916	G323299E66302N	-36.701	66.3024	LGIC
GGN0159	66.3167	-51.4167			Sarfartooq Gletsjer	Sarfartooq Gletsjer		RGI40-05.00794	G308453E66278N	-51.5466	66.2781	LGIC
GGN0160	66.3176	-35.7902	Apuseerajik	Apusêrajik		Apuseerajik		RGI40-05.13978	G324231E66323N	-35.7689	66.3231	LGIC
GGN0161	66.3504	-52.5585	Serminnguaq	Sermínguaq		Serminnguaq		RGI40-05.00793	G307609E66296N	-52.3907	66.2959	LGIC
GGN0162	66.3714	-36.1673			Håbet Gletsjer	Håbet Gletsjer		RGI40-05.13995	G323748E66257N	-36.2521	66.2572	LGIC
GGN0163	66.3735	-38.3067			Helheim Gletsjer	Helheim Gletsjer						GrIS
GGN0164	66.3803	-34.8863	Tuttiliip Kattertarpia	Tugtilîp Kagtilersorpia		Tuttiliip Kattertarpia	Tuttiliip Kattilersorpia; Tuddiliip Kaddilertsarpia	RGI40-05.13754	G325104E66415N	-34.8964	66.4146	LGIC
GGN0165	66.382	-37.5439	Apuseerajik	Apusêrajik	Fenris Gletsjer	Apuseerajik	Apuseerngai					GrIS
GGN0166	66.3873	-35.2929	Nigertuluup Kattilertarpia Oqqorteq	Nigertulûp Kagtilersarpia orqorseq		Nigertuluup Kattilertarpia Oqqorteq	Nigertuluup Kattilersorpia Oqqorseq; Ningertuluup Kaddilertsarpia Oqqortser	RGI40-05.13965	G324755E66481N	-35.2453	66.481	LGIC
GGN0167	66.4335	-35.1614	Nigertuluup Kattilertarpia Kiatteq	Nigertulûp Kagtilersarpia Kiáteq		Nigertuluup Kattilertarpia Kiatteq	Nigertuluup Kattilersarpia Kiatteq; NIngertuluup Kaddilertsarpia Kiadder	RGI40-05.13965	G324755E66481N	-35.2453	66.481	LGIC
GGN0168	66.4436	-36.7381	Nigertiip Apusiia		Midgård Gletsjer	Nigertiip Apusiia	Ningertii apusiia					GrIS
GGN0169	66.4475	-35.723	Kattilertarpia	Kagtilersorpia		Kattilertarpia	Kattilersorpia; Kaddilertsarpia	RGI40-05.13961	G324527E66490N	-35.4731	66.4903	LGIC
GGN0170	66.5008	-37.8436			Skakt Gletsjer	Skakt Gletsjer		RGI40-05.12459	G322152E66557N	-37.8484	66.5573	LGIC
GGN0171	66.5056	-34.8588	Sulussuulip Apusiia	Sulugssûtip Apusîa	K.J.V. Steenstrup Søndre Bræ	Sulussuulip Apusiia	Sulussuutip Apusiia; Tsulutsuulip Apusiia	RGI40-05.13952	G325098E66512N	-34.9024	66.5124	LGIC
GGN0172	66.5145	-52.6893	Serminnguaq	Sermínguaq		Serminnguaq		RGI40-05.00991	G307314E66506N	-52.6861	66.5064	LGIC
GGN0173	66.5209	-36.2361	Kattilersorpia	Kagtilersorpia	Glacier de France	Kattilersorpia		RGI40-05.13983	G324091E66567N	-35.909	66.5668	LGIC
GGN0174	66.5665	-36.7678			Franche Comté Gletsjer	Franche Comté Gletsjer						GrIS
GGN0175	66.5955	-34.727			K.J.V. Steenstrup Nordre Bræ	K.J.V. Steenstrup Nordre Bræ						GrIS
GGN0176	66.6219	-36.1169			Pourquoi-pas Gletsjer	Pourquoi-pas Gletsjer		RGI40-05.13983	G324091E66567N	-35.909	66.5668	LGIC
GGN0177	66.65	-36.6667			Femstjernen	Femstjernen						GrIS
GGN0178	66.732	-36.1779			Champs Elysees Gletsjer	Champs Elysees Gletsjer						GrIS
GGN0179	66.7333	-37.0667			Juragletsjeren	Juragletsjeren						GrIS
GGN0180	66.7914	-36.2178			Kristian Gletsjer	Kristian Gletsjer						GrIS
GGN0181	66.8312	-36.8344			Paris Gletsjer	Paris Gletsjer						GrIS
GGN0182	66.8833	-36.75			Bjørnegletsjer	Bjørnegletsjer						GrIS
GGN0183	66.9	-37.25			Døren	Døren						GrIS
GGN0184	66.9304	-36.949			Forelporten	Forelporten						GrIS
GGN0185	66.9315	-36.6762			Vinduet	Vinduet						GrIS
GGN0186	66.9367	-34.1148			Laube Gletsjer	Laube Gletsjer		RGI40-05.12089	G325788E66942N	-34.212	66.9415	LGIC
GGN0187	66.9661	-36.741			Nordgabet	Nordgabet						GrIS
GGN0188	67.1875	-50.1716	Isunnguata Sermia	Isúnguata Sermia		Isunnguata Sermia						GrIS
GGN0189	67.5167	-49.9167	Inuppaat Quuat	Inugpait Qûat		Inuppaat Quuat						GrIS
GGN0190	67.8774	-33.3799			Søndre Parallelgletsjer	Søndre Parallelgletsjer		RGI40-05.12680	G326477E67858N	-33.5228	67.8583	LGIC
GGN0191	67.8935	-33.2983			Nordre Parallelgletsjer	Nordre Parallelgletsjer		RGI40-05.12680	G326477E67858N	-33.5228	67.8583	LGIC
GGN0192	67.9422	-50.109			Geographical Union Gletsjer	Geographical Union Gletsjer						GrIS
GGN0193	67.95	-32.45	Apuliliip Apusiia	Aputitêrtîp Apusîa	Polaric Gletsjer	Apuliliip Apusiia	Aputiteertiip Apusiia; Apuliliip Apusiia	RGI40-05.12685	G327559E68005N	-32.4408	68.0045	LGIC
GGN0194	67.9505	-50.3005	Usulluup Sermia	Usugdlûp Sermia	Poloniagletsjer	Usulluup Sermia						GrIS
GGN0195	68.0833	-50.2667			J.P. Koch Gletsjer	J.P. Koch Gletsjer						GrIS
GGN0196	68.1109	-32.856			Hutchinson Gletsjer	Hutchinson Gletsjer		RGI40-05.12685	G327559E68005N	-32.4408	68.0045	LGIC
GGN0197	68.1167	-31.7			Tindegletsjer	Tindegletsjer		RGI40-05.12372	G328315E68124N	-31.685	68.1235	LGIC
GGN0198	68.1258	-31.6855			Brødregletsjer	Brødregletsjer		RGI40-05.12372	G328315E68124N	-31.685	68.1235	LGIC
GGN0199	68.1281	-31.613			Hammer Gletsjer	Hammer Gletsjer		RGI40-05.12414	G328401E68133N	-31.599	68.1332	LGIC
GGN0200	68.1409	-31.6752			Basisgletsjer	Basisgletsjer		RGI40-05.12402	G328322E68141N	-31.6783	68.1405	LGIC
GGN0201	68.1545	-31.5739			Udløberen	Udløberen		RGI40-05.12567	G328426E68160N	-31.574	68.1603	LGIC
GGN0202	68.1758	-31.6404			Forbindelsesgletsjer	Forbindelsesgletsjer		RGI40-05.12568	G328377E68172N	-31.6234	68.1719	LGIC
GGN0203	68.2236	-31.6658			Dobbeltgletsjeren	Dobbeltgletsjeren		RGI40-05.12692	G328363E68219N	-31.6369	68.2186	LGIC
GGN0204	68.2558	-30.9283			Schelderup Gletsjer	Schelderup Gletsjer		RGI40-05.12852	G328959E68281N	-31.041	68.2814	LGIC
GGN0205	68.2679	-32.3974			Søndre Syenitgletsjer	Søndre Syenitgletsjer		RGI40-05.12686	G327585E68274N	-32.4146	68.2744	LGIC
GGN0206	68.2912	-32.7787			Hovedvejen	Hovedvejen		RGI40-05.12903	G327175E68227N	-32.8248	68.2265	LGIC
GGN0207	68.3054	-32.379			Nordre Syenitgletsjer	Nordre Syenitgletsjer		RGI40-05.12906	G327622E68308N	-32.3779	68.3084	LGIC
GGN0208	68.3254	-51.0073	Akuliarutsip Sermia	Akuliarutsip Sermia	Nordenskiöld Gletsjer	Akuliarutsip Sermia	Akuliarutsip Sermersua; Tasiusarsuup Sermersua					GrIS
GGN0209	68.3333	-31.9167			Sidegletsjer	Sidegletsjer		RGI40-05.12769	G328155E68353N	-31.8455	68.3529	LGIC
GGN0210	68.3454	-32.4722			Kælvegletsjer	Kælvegletsjer		RGI40-05.12934	G327414E68310N	-32.5857	68.3103	LGIC
GGN0211	68.4557	-31.662			Frederiksborg Gletsjer	Frederiksborg Gletsjer						GrIS
GGN0212	68.506	-30.9328			Sorgenfri Gletsjer	Sorgenfri Gletsjer						GrIS
GGN0213	68.5822	-31.6375			Gaffelen	Gaffelen						GrIS
GGN0214	68.5975	-32.0228			Courtauld Gletsjer	Courtauld Gletsjer						GrIS
GGN0215	68.6164	-33.2201	Apuseeq Qinnilik	Apusêq Qivnilik		Apuseeq Qinnilik						GrIS
GGN0216	68.6369	-29.3836			Rosenborg Gletsjer	Rosenborg Gletsjer		RGI40-05.13667	G330976E68786N	-29.0236	68.7861	LGIC
GGN0217	68.6372	-31.4921			Læbæltet	Læbæltet						GrIS
GGN0218	68.6746	-33.076			Kangerlussuaq Gletsjer	Kangerlussuaq Gletsjer						GrIS
GGN0219	68.6934	-32.3728			Styrtegletsjer	Styrtegletsjer						GrIS
GGN0220	68.7	-30.6167			Christian IV Gletsjer	Christian IV Gletsjer						GrIS
GGN0221	68.7194	-32.6487			Nordfjord Gletsjer	Nordfjord Gletsjer						GrIS
GGN0222	68.7247	-28.6544			Kronborg Gletsjer	Kronborg Gletsjer		RGI40-05.13667	G330976E68786N	-29.0236	68.7861	LGIC
GGN0223	68.7497	-28.1278			Borggraven	Borggraven		RGI40-05.13536	G331157E69166N	-28.8434	69.1659	LGIC
GGN0224	68.7853	-30.1831			Korridoren	Korridoren						GrIS
GGN0225	68.8167	-27.0833			Sortebræ	Sortebræ		RGI40-05.13429	G332759E68980N	-27.2411	68.9795	LGIC
GGN0226	68.8249	-31.0979			Isfaldgletsjer	Isfaldgletsjer						GrIS
GGN0227	68.8667	-50.2833	Saqqarliup Sermia	Sarqardliup Sermia		Saqqarliup Sermia						GrIS
GGN0228	68.8667	-26.1	Apuseeq Anittangasikkaajuk		Storbræ	Apuseeq Anittangasikkaajuk	Apuseer anittangasikkaaju	RGI40-05.13499	G333654E69030N	-26.3461	69.0304	LGIC
GGN0229	68.9167	-50.2	Alanngorliup Sermia	Alángordliup Sermia		Alanngorliup Sermia						GrIS
GGN0230	68.9461	-31.5994			Øvre Frederiksborg Gletsjer	Øvre Frederiksborg Gletsjer						GrIS
GGN0231	68.9809	-29.9736			Gino Gletsjer	Gino Gletsjer						GrIS
GGN0232	69.0667	-29.3			Kronborg Gletsjer	Kronborg Gletsjer		RGI40-05.13667	G330976E68786N	-29.0236	68.7861	LGIC
GGN0233	69.1	-30.5833			Lindbergh Gletsjer	Lindbergh Gletsjer						GrIS
GGN0234	69.1667	-31.1333			Seward Gletsjer	Seward Gletsjer						GrIS
GGN0235	69.1833	-49.8	Sermeq Kujalleq	Sermeq Kujatdleq	Jakobshavn Isbræ	Sermeq Kujalleq						GrIS
GGN0236	69.3	-53.5672			Petersen Gletsjer	Petersen Gletsjer		RGI40-05.00623	G306428E69317N	-53.5718	69.3166	LGIC
GGN0237	69.3	-53.4005			Pjetursson Gletsjer	Pjetursson Gletsjer		RGI40-05.00602	G306613E69293N	-53.3869	69.293	LGIC
GGN0238	69.3333	-53.6005			Lyngmarksbræ	Lyngmarksbræ		RGI40-05.00621	G306381E69333N	-53.6191	69.3331	LGIC
GGN0239	69.35	-53.5839			Chamberlin Gletsjer	Chamberlin Gletsjer		RGI40-05.00627	G306414E69352N	-53.5861	69.3524	LGIC
GGN0240	69.3833	-50.2667	Sermeq Avannarleq	Sermeq Avangnardleq		Sermeq Avannarleq						GrIS
GGN0241	69.4	-31			Gronau Gletsjer	Gronau Gletsjer						GrIS
GGN0242	69.5	-29.8333			Grønlands Styrelse Gletsjer	Grønlands Styrelse Gletsjer						GrIS
GGN0243	69.55	-53.0004			C.A. Nielsen Bræ	C.A. Nielsen Bræ		RGI40-05.01335	G307040E69541N	-52.9599	69.5406	LGIC
GGN0244	69.6	-25.5			Dendritgletsjer	Dendritgletsjer		RGI40-05.13575	G333975E69553N	-26.0253	69.5532	LGIC
GGN0245	69.6142	-52.918			Steenstrup Gletsjer	Steenstrup Gletsjer		RGI40-05.01358	G307148E69623N	-52.852	69.6229	LGIC
GGN0246	69.6567	-24.1294			Bartholin Bræ	Bartholin Bræ		RGI40-05.13717	G335358E69815N	-24.6421	69.8145	LGIC
GGN0247	69.6939	-52.9475	Sermersuaq	Sermerssuaq	Storbræen	Sermersuaq		RGI40-05.01371	G306980E69700N	-53.02	69.6998	LGIC
GGN0248	69.7333	-52.817			Moltke Gletsjer	Moltke Gletsjer		RGI40-05.01355	G307166E69739N	-52.8339	69.7386	LGIC
GGN0249	69.7836	-54.1239	Sermia	Sermia		Sermia		RGI40-05.01216	G305860E69779N	-54.1402	69.7793	LGIC
GGN0250	69.808	-50.1851	Eqip Sermia	Eqip Sermia		Eqip Sermia						GrIS
GGN0251	69.8167	-53.3338			Snekalotten	Snekalotten		RGI40-05.01445	G306658E69817N	-53.3417	69.8166	LGIC
GGN0252	69.8567	-23.5624			Steno Bræ	Steno Bræ		RGI40-05.13505	G336006E69900N	-23.9944	69.9001	LGIC
GGN0253	69.9009	-50.342	Kangilernata Sermia	Kangilernata Sermia		Kangilernata Sermia	Kangilerngata Sermia;Sermeq Av					GrIS
GGN0254	69.9333	-27.75			Kista Dan Gletsjer	Kista Dan Gletsjer		RGI40-05.13567	G331685E69750N	-28.3152	69.75	LGIC
GGN0255	69.9333	-27.0833			Magga Dan Gletsjer	Magga Dan Gletsjer		RGI40-05.13501	G332658E69567N	-27.3418	69.5665	LGIC
GGN0256	69.996	-50.1596	Sermeq Kujalleq	Sermeq Kujatdleq		Sermeq Kujalleq	Alianaatsup Sermia					GrIS
GGN0257	70.0496	-22.4683			Sfinxgletsjer	Sfinxgletsjer		RGI40-05.13619	G337529E70042N	-22.4713	70.0418	LGIC
GGN0258	70.0497	-28.6343			Gåsegletsjer	Gåsegletsjer		RGI40-05.14872	G330936E69934N	-29.0638	69.9341	LGIC
GGN0259	70.0567	-22.7303	Ilinnigajia	Ilivnikajia	Roma Gletsjer	Ilinnigajia	Ilinnikajia; Ilinnigajja	RGI40-05.13616	G337269E70048N	-22.7308	70.0477	LGIC
GGN0260	70.0652	-26.2688			Sydbræ	Sydbræ		RGI40-05.13722	G333752E70017N	-26.2477	70.0167	LGIC
GGN0261	70.0667	-23.3333			Torvgletsjer	Torvgletsjer		RGI40-05.13568	G336622E69997N	-23.3778	69.9968	LGIC
GGN0262	70.0784	-22.9249			Milano Gletsjer	Milano Gletsjer		RGI40-05.13497	G337049E70068N	-22.9511	70.0679	LGIC
GGN0263	70.0824	-22.4312	Kikkiagajik		Kamelgletsjer	Kikkiagajik	Kikkiagai	RGI40-05.14995	G337618E70091N	-22.3823	70.0914	LGIC
GGN0264	70.0838	-23.57			Østre Borggletsjer	Østre Borggletsjer		RGI40-05.13565	G336337E70062N	-23.6634	70.062	LGIC
GGN0265	70.0853	-50.2468	Sermeq Avannarleq	Sermeq Avangnardleq		Sermeq Avannarleq						GrIS
GGN0266	70.0875	-23.1274	Nakkaagajik Avatteq	Nákâkajik		Nakkaagajik Avatteq	Nakkaakajik; Nakkaagai; Nakkaagai avadder	RGI40-05.13628	G336904E70076N	-23.0956	70.076	LGIC
GGN0267	70.0993	-23.8397	Nakkaagajik Timerseq		Vestre Borggletsjer	Nakkaagajik Timerseq	Nakkaagai Dimerser	RGI40-05.13564	G335798E70038N	-24.2019	70.0384	LGIC
GGN0268	70.1031	-23.4604			Torvet	Torvet		RGI40-05.13566	G336557E70090N	-23.4434	70.0903	LGIC
GGN0269	70.1597	-26.8597			Rævebræ	Rævebræ		RGI40-05.13281	G333205E70140N	-26.7951	70.1401	LGIC
GGN0270	70.1709	-25.9126			Østbræ	Østbræ		RGI40-05.13625	G334135E70167N	-25.8648	70.1672	LGIC
GGN0271	70.1747	-24.1493			Månegletsjer	Månegletsjer		RGI40-05.13495	G335865E70129N	-24.1355	70.1289	LGIC
GGN0272	70.1823	-25.1091			Bredegletsjer	Bredegletsjer		RGI40-05.13726	G334864E70010N	-25.1365	70.0096	LGIC
GGN0273	70.1833	-24.5167			Solgletsjer	Solgletsjer		RGI40-05.13496	G335518E70165N	-24.4821	70.1648	LGIC
GGN0274	70.2578	-24.773			Foldegletsjer	Foldegletsjer		RGI40-05.13728	G335200E70232N	-24.8005	70.2321	LGIC
GGN0275	70.2942	-29.4703			Vestfjord Gletsjer	Vestfjord Gletsjer						GrIS
GGN0276	70.2969	-25.0435			Helgegletsjer	Helgegletsjer		RGI40-05.13464	G334981E70270N	-25.0192	70.2696	LGIC
GGN0277	70.3479	-51.355	Sermikassak	Sermikavsak		Sermikassak		RGI40-05.02159	G308607E70361N	-51.3926	70.3605	LGIC
GGN0278	70.4	-51.8333	Sermersuaq	Sermerssuaq		Sermersuaq		RGI40-05.02163	G308199E70378N	-51.8006	70.3778	LGIC
GGN0279	70.4054	-50.5364	Sermeq Kujalleq	Sermeq Kujatdleq	Store Gletsjer	Sermeq Kujalleq						GrIS
GGN0280	70.4122	-51.566	Ilusissup Sermia	Ilusigsup Sermia		Ilusissup Sermia		RGI40-05.02147	G308389E70400N	-51.6109	70.3997	LGIC
GGN0281	70.4754	-51.9816	Umiartorfiup Sermia	Umiartorfiup Sermia		Umiartorfiup Sermia		RGI40-05.02123	G307948E70447N	-52.0517	70.4471	LGIC
GGN0282	70.481	-52.5397	Sermikassak	Sermikavsak		Sermikassak		RGI40-05.02126	G307537E70486N	-52.4633	70.4863	LGIC
GGN0283	70.4833	-29.2833			Døde Bræ	Døde Bræ						GrIS
GGN0284	70.5316	-52.0627	Assakaat Sermiat	Agssakait Sermiat		Assakaat Sermiat		RGI40-05.02117	G307855E70484N	-52.145	70.4839	LGIC
GGN0285	70.5319	-28.9019			Rolige Bræ	Rolige Bræ						GrIS
GGN0286	70.5412	-29.3363			Langemanden	Langemanden		RGI40-05.15186	G330611E70544N	-29.3892	70.5435	LGIC
GGN0287	70.5454	-50.4896	Sermeq Avannarleq	Sermeq Avangnardleq	Lille Gletsjer	Sermeq Avannarleq						GrIS
GGN0288	70.6225	-53.402	Aaffarsuup Sermia	Auvfarssûp Sermia		Aaffarsuup Sermia		RGI40-05.02281	G306592E70619N	-53.4085	70.6194	LGIC
GGN0289	70.6251	-52.8178	Sermersuaq	Sermerssuaq		Sermersuaq		RGI40-05.02318	G307216E70649N	-52.7843	70.6488	LGIC
GGN0290	70.6333	-50.6167	Sermilik	Sermilik	Sermilik Isbræ	Sermilik						GrIS
GGN0291	70.6399	-22.1009			Grete Gletsjer	Grete Gletsjer		RGI40-05.15821	G337976E70640N	-22.024	70.6399	LGIC
GGN0292	70.6746	-53.2073	Qiterlikassaap Sermia	Qiterdlikavsaup Sermia		Qiterlikassaap Sermia		RGI40-05.02278	G306792E70668N	-53.2078	70.6677	LGIC
GGN0293	70.6768	-22.1299			Hans Gletsjer	Hans Gletsjer		RGI40-05.15836	G337933E70679N	-22.0673	70.6789	LGIC
GGN0294	70.6833	-21.8667	Apusiikajik	Apusîkajik	Aage Nielsen Gletsjer	Apusiikajik		RGI40-05.15834	G338097E70681N	-21.9028	70.681	LGIC
GGN0295	70.7184	-50.6523	Kangilleq	Kangigdleq		Kangilleq						GrIS
GGN0296	70.735	-21.9603			Bjerring Pedersen Gletsjer	Bjerring Pedersen Gletsjer		RGI40-05.15827	G338040E70737N	-21.9598	70.7369	LGIC
GGN0297	70.7474	-50.6447	Sisoortartukassak	Sisôrtartukavsak		Sisoortartukassak						GrIS
GGN0298	70.8021	-26.2411			Korridoren	Korridoren		RGI40-05.15467	G333613E70810N	-26.3872	70.8097	LGIC
GGN0299	70.8268	-50.7627	Sermeq Silarleq	Sermeq Silardleq		Sermeq Silarleq						GrIS
GGN0300	70.8463	-21.8827			Emmanuel Gletsjer	Emmanuel Gletsjer		RGI40-05.16232	G338047E70864N	-21.9527	70.8639	LGIC
GGN0301	70.9359	-52.0836	Serminnguaq	Sermínguaq		Serminnguaq		RGI40-05.02345	G307956E70929N	-52.0442	70.9292	LGIC
GGN0302	70.9541	-51.5766	Sisuugajooq	Sisûgajôq		Sisuugajooq		RGI40-05.02359	G308485E70961N	-51.5146	70.9613	LGIC
GGN0303	70.9909	-50.9227	Perlerfiup Sermia	Perdlerfiup Sermia		Perlerfiup Sermia						GrIS
GGN0304	71.0015	-51.4613	Sermipalaaq			Sermipalaaq		RGI40-05.02353	G308510E70986N	-51.4903	70.9857	LGIC
GGN0305	71.0275	-50.8354	Sermeq Avannarleq	Sermeq Avangnardleq		Sermeq Avannarleq	Avannarleq					GrIS
GGN0306	71.0349	-51.7	Sermikassak	Sermikavsak		Sermikassak		RGI40-05.02352	G308332E71004N	-51.6682	71.004	LGIC
GGN0307	71.1435	-51.3648	Tassartooq	Tavsartôq		Tassartooq		RGI40-05.02422	G308609E71159N	-51.3909	71.1585	LGIC
GGN0308	71.15	-51.1667	Qaamarujuup Sermia	Qaumarujûp Sermia		Qaamarujuup Sermia	Qaamarujuup Sermikassaa					GrIS
GGN0309	71.1667	-28.0833			Eielson Gletsjer	Eielson Gletsjer						GrIS
GGN0310	71.1745	-26.598			Edward Bailey Gletsjer	Edward Bailey Gletsjer		RGI40-05.16072	G333444E71216N	-26.556	71.2164	LGIC
GGN0311	71.1911	-52.7654	Serminnguaq	Sermínguaq		Serminnguaq	Sermikassak	RGI40-05.02495	G307266E71206N	-52.7337	71.2057	LGIC
GGN0312	71.2362	-51.6242	Umiatsiakassak			Umiatsiakassak		RGI40-05.02417	G308407E71224N	-51.5926	71.2236	LGIC
GGN0313	71.2493	-51.4707	Kangerluarsuup Sermia	Kangerdluarssûp Sermia		Kangerluarsuup Sermia						GrIS
GGN0314	71.25	-28.8333			Vindue Gletsjer	Vindue Gletsjer						GrIS
GGN0315	71.2578	-52.0132	Aappaluttukassaap Kangiani Sermikassak	Augpalugtukavsaup Kangiane Sermikavsak		Aappaluttukassaap Kangiani Sermikassak		RGI40-05.02452	G307917E71273N	-52.0835	71.2728	LGIC
GGN0316	71.2667	-53.0333	Qunnertusup Sermia	Quvnertussup Sermia		Qunnertusup Sermia		RGI40-05.02489	G307163E71277N	-52.837	71.2765	LGIC
GGN0317	71.2833	-27.5333			Syvsøstre Bræ	Syvsøstre Bræ		RGI40-05.16097	G332579E71266N	-27.4215	71.2663	LGIC
GGN0318	71.3134	-53.0942	Sermeq Qiterleq	Sermeq Qiterdleq		Sermeq Qiterleq		RGI40-05.02486	G307016E71310N	-52.9842	71.3103	LGIC
GGN0319	71.3295	-53.0957	Qungulertusup Sermia	Qungulertussup Sermia		Qungulertusup Sermia		RGI40-05.02485	G307062E71341N	-52.9382	71.3411	LGIC
GGN0320	71.3298	-25.9038	Apusinigajik	Apusinikajik		Apusinigajik		RGI40-05.16061	G333795E71323N	-26.2049	71.3234	LGIC
GGN0321	71.3478	-51.8294	Sermikassak	Sermikavsak		Sermikassak		RGI40-05.02541	G308135E71360N	-51.8652	71.3601	LGIC
GGN0322	71.4129	-52.0067	Nunaarsussuup Oqquatungaani Sermikassak			Nunaarsussuup Oqquatungaani Sermikassak		RGI40-05.02526	G308023E71368N	-51.9767	71.3681	LGIC
GGN0323	71.4193	-51.9238	Nunaarsussuup Kangiatungaani Sermikassak			Nunaarsussuup Kangiatungaani Sermikassak		RGI40-05.02527	G308139E71396N	-51.8615	71.3961	LGIC
GGN0324	71.4333	-29.5833			Freuchen Gletsjer	Freuchen Gletsjer						GrIS
GGN0325	71.435	-51.4196	Sermip Kujataatungaani Sermikassak			Sermip Kujataatungaani Sermikassak		RGI40-05.02547	G308526E71392N	-51.4743	71.3916	LGIC
GGN0326	71.4588	-51.3101	Kangerlussuup Sermia			Kangerlussuup Sermia						GrIS
GGN0327	71.5015	-51.7892	Nakkala			Nakkala		RGI40-05.02619	G308040E71507N	-51.9601	71.5068	LGIC
GGN0328	71.5187	-51.6101	Sermikassak			Sermikassak		RGI40-05.02622	G308214E71544N	-51.7863	71.5438	LGIC
GGN0329	71.5207	-25.3095			Oxford Gletsjer	Oxford Gletsjer		RGI40-05.17200	G334740E71586N	-25.2602	71.5859	LGIC
GGN0330	71.5663	-52.1744	Tinumanikassaata Sermia			Tinumanikassaata Sermia		RGI40-05.02616	G307887E71521N	-52.1126	71.5211	LGIC
GGN0331	71.5914	-51.7084	Sermikassak	Sermikavsak	Johannes Bræ	Sermikassak						GrIS
GGN0332	71.6169	-25.5059			Løberen	Løberen		RGI40-05.17150	G334470E71600N	-25.5303	71.6003	LGIC
GGN0333	71.6454	-24.9199			Leo Gletsjer	Leo Gletsjer		RGI40-05.17177	G335124E71666N	-24.8763	71.6664	LGIC
GGN0334	71.6557	-25.0079			Mercurius Gletsjer	Mercurius Gletsjer		RGI40-05.17177	G335124E71666N	-24.8763	71.6664	LGIC
GGN0335	71.6717	-25.2579			Ursus Minor Gletsjer	Ursus Minor Gletsjer		RGI40-05.17177	G335124E71666N	-24.8763	71.6664	LGIC
GGN0336	71.6794	-53.2674	Sermikassak			Sermikassak		RGI40-05.02724	G306804E71662N	-53.1958	71.6616	LGIC
GGN0337	71.6846	-25.1825			Virgo Gletsjer	Virgo Gletsjer		RGI40-05.17177	G335124E71666N	-24.8763	71.6664	LGIC
GGN0338	71.6887	-25.2629			Jupiter Gletsjer	Jupiter Gletsjer		RGI40-05.17177	G335124E71666N	-24.8763	71.6664	LGIC
GGN0339	71.6939	-24.9805			Bjørnbo Gletsjer	Bjørnbo Gletsjer		RGI40-05.17177	G335124E71666N	-24.8763	71.6664	LGIC
GGN0340	71.6975	-25.7829			Borgbjerg Gletsjer	Borgbjerg Gletsjer		RGI40-05.17145	G334174E71767N	-25.8256	71.7668	LGIC
GGN0341	71.6983	-25.3621			Ursus Major Gletsjer	Ursus Major Gletsjer		RGI40-05.17177	G335124E71666N	-24.8763	71.6664	LGIC
GGN0342	71.7241	-25.3184			Orion Gletsjer	Orion Gletsjer		RGI40-05.17177	G335124E71666N	-24.8763	71.6664	LGIC
GGN0343	71.7405	-25.2599			Pegasus Gletsjer	Pegasus Gletsjer		RGI40-05.17177	G335124E71666N	-24.8763	71.6664	LGIC
GGN0344	71.7442	-24.8901			Saturn Gletsjer	Saturn Gletsjer		RGI40-05.17220	G335105E71744N	-24.8947	71.7444	LGIC
GGN0345	71.75	-29			Daugaard-Jensen Gletsjer	Daugaard-Jensen Gletsjer						GrIS
GGN0346	71.7548	-25.0045			Mars Gletsjer	Mars Gletsjer		RGI40-05.17177	G335124E71666N	-24.8763	71.6664	LGIC
GGN0347	71.7723	-51.4951	Kangilliup Sermia	Kangigdliup Sermia	Rink Isbræ	Kangilliup Sermia						GrIS
GGN0348	71.8063	-52.3578	Umiammakku Sermiat	Umiámáko Sermiat	Umiammakku Isbræ	Umiammakku Sermiat	Umiammakku Sermia					GrIS
GGN0349	71.8705	-24.1855			Nedre Randgletsjer	Nedre Randgletsjer		RGI40-05.17743	G335827E71868N	-24.1733	71.8677	LGIC
GGN0350	71.8763	-23.9829			Breithorn Gletsjer	Breithorn Gletsjer		RGI40-05.17067	G335975E71859N	-24.0255	71.8592	LGIC
GGN0351	71.8833	-24.15			Øvre Randgletsjer	Øvre Randgletsjer		RGI40-05.17071	G335932E71895N	-24.0677	71.8948	LGIC
GGN0352	71.8971	-24.149			Aldebaran Gletsjer	Aldebaran Gletsjer		RGI40-05.17071	G335932E71895N	-24.0677	71.8948	LGIC
GGN0353	71.9101	-25.4527			Duart Gletsjer	Duart Gletsjer		RGI40-05.17192	G334487E71915N	-25.5134	71.9145	LGIC
GGN0354	71.9116	-23.7997			Søndergletsjer	Søndergletsjer		RGI40-05.17065	G336181E71913N	-23.8195	71.9129	LGIC
GGN0355	71.9159	-24.6469			Storgletsjer	Storgletsjer		RGI40-05.17160	G335162E71964N	-24.8384	71.964	LGIC
GGN0356	71.9211	-26.3723			Sydgletsjer	Sydgletsjer		RGI40-05.17186	G333680E71859N	-26.3201	71.8593	LGIC
GGN0357	71.9217	-23.9131			Hvidefirn	Hvidefirn		RGI40-05.17163	G335939E71927N	-24.0613	71.9274	LGIC
GGN0358	71.932	-25.5232			Spærregletsjer	Spærregletsjer		RGI40-05.17192	G334487E71915N	-25.5134	71.9145	LGIC
GGN0359	71.9337	-24.0653			Sirius Gletsjer	Sirius Gletsjer		RGI40-05.17163	G335939E71927N	-24.0613	71.9274	LGIC
GGN0360	71.9416	-23.7826			Cirkusgletsjer	Cirkusgletsjer		RGI40-05.17062	G336219E71937N	-23.7811	71.9367	LGIC
GGN0361	71.945	-25.8438			Prinsessegletsjer	Prinsessegletsjer		RGI40-05.17084	G334134E71899N	-25.8664	71.8987	LGIC
GGN0362	71.9466	-25.4366			Parker Piece	Parker Piece		RGI40-05.17192	G334487E71915N	-25.5134	71.9145	LGIC
GGN0363	71.95	-24.3			Schuchert Gletsjer	Schuchert Gletsjer		RGI40-05.17199	G335513E72006N	-24.4872	72.0063	LGIC
GGN0364	71.9512	-26.6473			Toscano Gletsjer	Toscano Gletsjer		RGI40-05.17126	G333324E71890N	-26.6761	71.8896	LGIC
GGN0365	71.9635	-24.2344			Arcturus Gletsjer	Arcturus Gletsjer		RGI40-05.17199	G335513E72006N	-24.4872	72.0063	LGIC
GGN0366	71.9643	-23.7558			Termier Gletsjer	Termier Gletsjer		RGI40-05.17782	G336238E71962N	-23.7621	71.9623	LGIC
GGN0367	71.9651	-24.1823			Bredefirn	Bredefirn		RGI40-05.17199	G335513E72006N	-24.4872	72.0063	LGIC
GGN0368	71.9667	-51.1667	Kangerlussuup Sermersua	Kangerdlugssûp Sermerssua		Kangerlussuup Sermersua						GrIS
GGN0369	71.9765	-25.1462			Canta Bræ	Canta Bræ		RGI40-05.17118	G334533E72097N	-25.4666	72.0966	LGIC
GGN0370	71.9807	-24.1573			Langefirn	Langefirn		RGI40-05.17199	G335513E72006N	-24.4872	72.0063	LGIC
GGN0371	71.9847	-23.7786			Nedre Antarctic Gletsjer	Nedre Antarctic Gletsjer		RGI40-05.17175	G336173E71978N	-23.8269	71.9777	LGIC
GGN0372	71.9849	-23.8516			Nedre Studer Gletsjer	Nedre Studer Gletsjer		RGI40-05.17175	G336173E71978N	-23.8269	71.9777	LGIC
GGN0373	71.9857	-24.1225			Mellemgletsjer	Mellemgletsjer		RGI40-05.17165	G335855E71993N	-24.1449	71.9933	LGIC
GGN0374	71.9906	-24.0389			Kargletsjer	Kargletsjer		RGI40-05.17049	G336036E71975N	-23.9644	71.9753	LGIC
GGN0375	71.992	-24.8181			Storgletsjer	Storgletsjer		RGI40-05.17160	G335162E71964N	-24.8384	71.964	LGIC
GGN0376	71.9922	-23.9226			Trestrømmen	Trestrømmen		RGI40-05.17049	G336036E71975N	-23.9644	71.9753	LGIC
GGN0377	72.0034	-55.3242	Sermersuaq	Sermerssuaq		Sermersuaq		RGI40-05.03148	G304671E72005N	-55.3286	72.0046	LGIC
GGN0378	72.0066	-23.8284			Nedre Studer Gletsjer	Nedre Studer Gletsjer		RGI40-05.17056	G336149E72004N	-23.8508	72.0037	LGIC
GGN0379	72.0115	-25.6215			Spærregletsjer	Spærregletsjer		RGI40-05.17192	G334487E71915N	-25.5134	71.9145	LGIC
GGN0380	72.0167	-27.9667			Universitetets Gletsjer	Universitetets Gletsjer		RGI40-05.16816	G331883E72130N	-28.1173	72.1295	LGIC
GGN0381	72.0167	-25.4333			Krabbegletsjer	Krabbegletsjer		RGI40-05.17070	G334634E71988N	-25.3661	71.9875	LGIC
GGN0382	72.0167	-24.1333			Vestre Gletsjer	Vestre Gletsjer		RGI40-05.17168	G335805E72027N	-24.1948	72.0269	LGIC
GGN0383	72.0175	-24.0809			Mellemgletsjer	Mellemgletsjer		RGI40-05.17165	G335855E71993N	-24.1449	71.9933	LGIC
GGN0384	72.0194	-23.8359			Øvre Studer Gletsjer	Øvre Studer Gletsjer		RGI40-05.17794	G336153E72017N	-23.8469	72.0173	LGIC
GGN0385	72.0266	-23.936			Sukces Gletsjer	Sukces Gletsjer		RGI40-05.17796	G336084E72025N	-23.9165	72.0254	LGIC
GGN0386	72.0293	-24.0038			Østre Gletsjer	Østre Gletsjer		RGI40-05.17049	G336036E71975N	-23.9644	71.9753	LGIC
GGN0387	72.0333	-25.2833			Tioram Gletsjer	Tioram Gletsjer		RGI40-05.17118	G334533E72097N	-25.4666	72.0966	LGIC
GGN0388	72.0345	-23.9124			Retrætegletsjer	Retrætegletsjer		RGI40-05.17808	G336131E72040N	-23.8695	72.0397	LGIC
GGN0389	72.036	-54.8766	Qatsinneq	Qatsingneq		Qatsinneq		RGI40-05.03185	G305094E72041N	-54.9063	72.0407	LGIC
GGN0390	72.0373	-52.6054	Salliarutsip Sermia	Sagdliarutsip Sermia	Inngia Isbræ	Salliarutsip Sermia						GrIS
GGN0391	72.05	-25.7667			Smallegletsjer	Smallegletsjer		RGI40-05.17019	G334126E72089N	-25.8736	72.0894	LGIC
GGN0392	72.053	-25.2319			Sefström Gletsjer	Sefström Gletsjer		RGI40-05.17118	G334533E72097N	-25.4666	72.0966	LGIC
GGN0393	72.0669	-26.0048			Scioragletsjer	Scioragletsjer		RGI40-05.17035	G334006E72088N	-25.9939	72.0875	LGIC
GGN0394	72.0833	-28.2333			F. Graae Gletsjer	F. Graae Gletsjer		RGI40-05.16814	G331780E72051N	-28.2204	72.0505	LGIC
GGN0395	72.0833	-24.7167			Glamis Gletsjer	Glamis Gletsjer		RGI40-05.17171	G335293E72137N	-24.7069	72.1369	LGIC
GGN0396	72.0833	-24.5			Kismul Gletsjer	Kismul Gletsjer		RGI40-05.17057	G335563E72066N	-24.4369	72.0659	LGIC
GGN0397	72.0833	-24.3833			Skelbræ	Skelbræ		RGI40-05.17057	G335563E72066N	-24.4369	72.0659	LGIC
GGN0398	72.0952	-25.2426			Gullygletsjer	Gullygletsjer		RGI40-05.17118	G334533E72097N	-25.4666	72.0966	LGIC
GGN0399	72.0962	-25.1727			Cavendish Gletsjer	Cavendish Gletsjer		RGI40-05.17118	G334533E72097N	-25.4666	72.0966	LGIC
GGN0400	72.1074	-26.1993			Langkløftgletsjer	Langkløftgletsjer		RGI40-05.17036	G333890E72125N	-26.11	72.1247	LGIC
GGN0401	72.1167	-24.5833			Beaumaris Gletsjer	Beaumaris Gletsjer		RGI40-05.17171	G335293E72137N	-24.7069	72.1369	LGIC
GGN0402	72.1333	-25.65			Trekantgletsjer	Trekantgletsjer		RGI40-05.17284	G334342E72139N	-25.6583	72.1394	LGIC
GGN0403	72.1333	-24.5833			Bersærkerbræ	Bersærkerbræ		RGI40-05.17171	G335293E72137N	-24.7069	72.1369	LGIC
GGN0404	72.1343	-27.6158			Jomfru Gletsjer	Jomfru Gletsjer		RGI40-05.16807	G332216E72175N	-27.7845	72.1747	LGIC
GGN0405	72.1364	-53.8372	Sermikassak	Sermikavsak		Sermikassak		RGI40-05.03166	G306140E72118N	-53.8605	72.1183	LGIC
GGN0406	72.1667	-25.7667			Sydvestgletsjer	Sydvestgletsjer		RGI40-05.17047	G334184E72124N	-25.8165	72.1236	LGIC
GGN0407	72.1667	-22.5667			Tårngletsjer	Tårngletsjer		RGI40-05.18669	G337470E72164N	-22.5303	72.164	LGIC
GGN0408	72.1667	-22.35			Årringgletsjer	Årringgletsjer		RGI40-05.18674	G337664E72169N	-22.3365	72.1688	LGIC
GGN0409	72.1833	-24.6667			Harlech Gletsjer	Harlech Gletsjer		RGI40-05.17171	G335293E72137N	-24.7069	72.1369	LGIC
GGN0410	72.185	-25.2984			Vikingebræ	Vikingebræ		RGI40-05.17117	G334930E72170N	-25.0698	72.1696	LGIC
GGN0411	72.1922	-22.4374			Rundgletsjer	Rundgletsjer		RGI40-05.18677	G337565E72191N	-22.4348	72.1912	LGIC
GGN0412	72.1929	-25.9228			Sandgletsjer	Sandgletsjer		RGI40-05.17042	G334024E72192N	-25.9764	72.192	LGIC
GGN0413	72.2	-25.0667			Frihedsgletsjer	Frihedsgletsjer		RGI40-05.17117	G334930E72170N	-25.0698	72.1696	LGIC
GGN0414	72.2	-24.5667			Tårnfjeld Gletsjer	Tårnfjeld Gletsjer		RGI40-05.17170	G335397E72218N	-24.6027	72.2183	LGIC
GGN0415	72.25	-25.25			Fangsthyttegletsjer	Fangsthyttegletsjer		RGI40-05.17344	G334791E72234N	-25.2086	72.2336	LGIC
GGN0416	72.2572	-24.4911			Flødegletsjer	Flødegletsjer		RGI40-05.17174	G335436E72251N	-24.5639	72.2511	LGIC
GGN0417	72.2576	-22.6804			Sjapgletsjer	Sjapgletsjer		RGI40-05.18682	G337333E72263N	-22.6666	72.2633	LGIC
GGN0418	72.2706	-22.6342			Bamsegletsjer	Bamsegletsjer		RGI40-05.18682	G337333E72263N	-22.6666	72.2633	LGIC
GGN0419	72.2722	-22.5101			Buegletsjer	Buegletsjer		RGI40-05.18689	G337493E72270N	-22.5068	72.2701	LGIC
GGN0420	72.2833	-24.5833			Pianofirn	Pianofirn		RGI40-05.17116	G335410E72273N	-24.5902	72.273	LGIC
GGN0421	72.2833	-24.7167			Skjoldungebræ	Skjoldungebræ		RGI40-05.17053	G335329E72221N	-24.6708	72.2206	LGIC
GGN0422	72.2833	-22.8			Forkgletsjer	Forkgletsjer		RGI40-05.18729	G337266E72308N	-22.7342	72.3082	LGIC
GGN0423	72.2834	-26.7563			Violingletsjer	Violingletsjer						GrIS
GGN0424	72.299	-26.3062			Kæmpegletsjer	Kæmpegletsjer		RGI40-05.17052	G333735E72257N	-26.2651	72.2569	LGIC
GGN0425	72.3	-25.1333			Sedgwick Gletsjer	Sedgwick Gletsjer		RGI40-05.17055	G334902E72279N	-25.0984	72.2786	LGIC
GGN0426	72.3	-22.9			Banangletsjer	Banangletsjer		RGI40-05.17918	G337093E72295N	-22.9066	72.2949	LGIC
GGN0427	72.3049	-22.5088			Gaffelgletsjer	Gaffelgletsjer		RGI40-05.18737	G337442E72291N	-22.5579	72.2908	LGIC
GGN0428	72.3069	-26.1843			Snedrivegletsjer	Snedrivegletsjer		RGI40-05.17052	G333735E72257N	-26.2651	72.2569	LGIC
GGN0429	72.3161	-22.5725			Brumse Gletsjer	Brumse Gletsjer		RGI40-05.18733	G337398E72309N	-22.6025	72.3094	LGIC
GGN0430	72.3167	-24.4667			Krypt Gletsjer	Krypt Gletsjer		RGI40-05.17877	G335526E72314N	-24.4737	72.3143	LGIC
GGN0431	72.3167	-22.7667			Barrikadegletsjer	Barrikadegletsjer		RGI40-05.18729	G337266E72308N	-22.7342	72.3082	LGIC
GGN0432	72.3176	-24.9395			Linne' Gletsjer	Linne' Gletsjer		RGI40-05.17198	G335076E72236N	-24.9241	72.2358	LGIC
GGN0433	72.3333	-24.5667			Sorteelv Gletsjer	Sorteelv Gletsjer		RGI40-05.17116	G335410E72273N	-24.5902	72.273	LGIC
GGN0434	72.3339	-22.6186			Langgletsjer	Langgletsjer		RGI40-05.17947	G337377E72333N	-22.6227	72.3334	LGIC
GGN0435	72.3355	-22.7135			Bredgletsjer	Bredgletsjer		RGI40-05.18729	G337266E72308N	-22.7342	72.3082	LGIC
GGN0436	72.45	-22.1			Haregletsjer	Haregletsjer		RGI40-05.18074	G337944E72442N	-22.0564	72.442	LGIC
GGN0437	72.4529	-22.0689			Ødegletsjer	Ødegletsjer		RGI40-05.18074	G337944E72442N	-22.0564	72.442	LGIC
GGN0438	72.4667	-22.15			Månegletsjer	Månegletsjer		RGI40-05.18079	G337863E72462N	-22.1371	72.4623	LGIC
GGN0439	72.4815	-22.1652			Polypen Gletsjer	Polypen Gletsjer		RGI40-05.18077	G337815E72469N	-22.1851	72.4694	LGIC
GGN0440	72.4839	-22.066			Fladegletsjer	Fladegletsjer		RGI40-05.18094	G337950E72482N	-22.0505	72.4823	LGIC
GGN0441	72.5088	-27.0544			Wahlenberg Gletsjer	Wahlenberg Gletsjer						GrIS
GGN0442	72.531	-26.4867			Vestre Tvillinggletsjer	Vestre Tvillinggletsjer		RGI40-05.18778	G333561E72500N	-26.4393	72.4995	LGIC
GGN0443	72.546	-26.4115			Østre Tvillinggletsjer	Østre Tvillinggletsjer		RGI40-05.18774	G333737E72517N	-26.2626	72.5169	LGIC
GGN0444	72.5497	-22.4777			Skjoldgletsjer	Skjoldgletsjer		RGI40-05.18116	G337504E72558N	-22.4962	72.5579	LGIC
GGN0445	72.639	-27.8958			Concordia Plads	Concordia Plads						GrIS
GGN0446	72.7	-25.9333			Argand Gletsjer	Argand Gletsjer		RGI40-05.18821	G334024E72591N	-25.9761	72.5905	LGIC
GGN0447	72.764	-28.6008			Verenagletsjer	Verenagletsjer						GrIS
GGN0448	72.7667	-25.3			Narhvalgletsjer	Narhvalgletsjer		RGI40-05.18033	G334688E72737N	-25.3118	72.7372	LGIC
GGN0449	72.7668	-27.3843			Langenthaler Gletsjer	Langenthaler Gletsjer		RGI40-05.17999	G332603E72742N	-27.3973	72.7422	LGIC
GGN0450	72.776	-27.7231			Hisinger Gletsjer	Hisinger Gletsjer						GrIS
GGN0451	72.8167	-28.3833			Passagegletsjer	Passagegletsjer		RGI40-05.18967	G331606E72823N	-28.3944	72.8234	LGIC
GGN0452	72.8409	-54.2837	Sermeq	Sermeq	Upernavik Isstrøm	Sermeq						GrIS
GGN0453	72.9066	-26.9645			Fulach Gletsjer	Fulach Gletsjer		RGI40-05.19162	G332905E72930N	-27.0947	72.9299	LGIC
GGN0454	72.9107	-26.1268			Østre Spærregletsjer	Østre Spærregletsjer		RGI40-05.18917	G333869E72887N	-26.1314	72.8873	LGIC
GGN0455	72.9182	-26.2701			Vestre Spærregletsjer	Vestre Spærregletsjer		RGI40-05.18903	G333661E72888N	-26.3386	72.8876	LGIC
GGN0456	72.9674	-27.9706			Charpentier Gletsjer	Charpentier Gletsjer		RGI40-05.18950	G331989E72965N	-28.0107	72.9654	LGIC
GGN0457	73	-28.1667			Nedre Rypegletsjer	Nedre Rypegletsjer						GrIS
GGN0458	73.0167	-28.1667			Rypegletsjer	Rypegletsjer						GrIS
GGN0459	73.0167	-28.0333			Øvre Rypegletsjer	Øvre Rypegletsjer						GrIS
GGN0460	73.0333	-27.9167			Mercanton Gletsjer	Mercanton Gletsjer		RGI40-05.18977	G332133E73047N	-27.8673	73.0469	LGIC
GGN0461	73.0461	-54.8756	Akullikassaap Sermia			Akullikassaap Sermia						GrIS
GGN0462	73.05	-28.35			Disa Gletsjer	Disa Gletsjer						GrIS
GGN0463	73.0667	-27.6			Riddergletsjer	Riddergletsjer		RGI40-05.18939	G332353E73059N	-27.6467	73.0592	LGIC
GGN0464	73.0759	-26.6804			Borggletsjer	Borggletsjer		RGI40-05.19134	G333282E73036N	-26.7185	73.0356	LGIC
GGN0465	73.0773	-26.7762			Stejlegletsjer	Stejlegletsjer		RGI40-05.19141	G333185E73051N	-26.8155	73.0513	LGIC
GGN0466	73.0859	-26.5836			Ispassagen	Ispassagen		RGI40-05.19143	G333446E73048N	-26.5538	73.0482	LGIC
GGN0467	73.1167	-26.0833			Sonklargletsjer	Sonklargletsjer		RGI40-05.19132	G333831E73107N	-26.1692	73.1072	LGIC
GGN0468	73.1309	-26.4614			Payer Gletsjer	Payer Gletsjer		RGI40-05.19105	G333615E73092N	-26.3848	73.0922	LGIC
GGN0469	73.1333	-28.2333			Nathorst Gletsjer	Nathorst Gletsjer		RGI40-05.18871	G331568E73118N	-28.4317	73.1175	LGIC
GGN0470	73.1333	-27.8833			Nordenskiöld Gletsjer	Nordenskiöld Gletsjer						GrIS
GGN0471	73.1667	-28.3333			Gregory Gletsjer	Gregory Gletsjer		RGI40-05.20117	G331649E73194N	-28.3512	73.1936	LGIC
GGN0472	73.1667	-28.45			Spaltegletsjer	Spaltegletsjer		RGI40-05.18871	G331568E73118N	-28.4317	73.1175	LGIC
GGN0473	73.1667	-26.4167			Kehlhofer Gletsjer	Kehlhofer Gletsjer		RGI40-05.19180	G333658E73148N	-26.3423	73.1479	LGIC
GGN0474	73.1667	-55.05	Alanngorsuup Sermia	Alángorssûp Sermia		Alanngorsuup Sermia						GrIS
GGN0475	73.1833	-27.8333			Portgletsjer	Portgletsjer		RGI40-05.19017	G332108E73178N	-27.8916	73.1784	LGIC
GGN0476	73.2014	-28.0141			Lavinegletsjer	Lavinegletsjer		RGI40-05.19003	G331986E73195N	-28.0143	73.1952	LGIC
GGN0477	73.2071	-28.0628			Stenløsgletsjer	Stenløsgletsjer		RGI40-05.19000	G331942E73192N	-28.058	73.1924	LGIC
GGN0478	73.2304	-27.7236			Lystergletsjer	Lystergletsjer		RGI40-05.19251	G332276E73272N	-27.7238	73.2716	LGIC
GGN0479	73.25	-28.8333			Victor Madsen Gletsjer	Victor Madsen Gletsjer						GrIS
GGN0480	73.25	-28.0167			Lejrgletsjer	Lejrgletsjer		RGI40-05.19253	G332000E73248N	-27.9997	73.2481	LGIC
GGN0481	73.25	-55.0833	Naajarsuit Sermiat			Naajarsuit Sermiat	Nunatakassaap Sermia					GrIS
GGN0482	73.35	-26.1667			Gauli Gletsjer	Gauli Gletsjer		RGI40-05.19489	G333810E73373N	-26.1897	73.3734	LGIC
GGN0483	73.4167	-25.9167			Luciagletsjer	Luciagletsjer		RGI40-05.19473	G333903E73407N	-26.0973	73.4073	LGIC
GGN0484	73.4333	-27.8667			Jættegletsjer	Jættegletsjer						GrIS
GGN0485	73.4667	-25.75			Blåbærgletsjer	Blåbærgletsjer		RGI40-05.19451	G334100E73475N	-25.8999	73.4748	LGIC
GGN0486	73.4784	-55.3035	Kakiffaat Sermiat	Kakivfait Sermiat		Kakiffaat Sermiat						GrIS
GGN0487	73.5359	-27.3987			Louise Gletsjer	Louise Gletsjer		RGI40-05.19083	G332484E73565N	-27.516	73.5648	LGIC
GGN0488	73.55	-29			Hamberg Gletsjer	Hamberg Gletsjer						GrIS
GGN0489	73.5667	-55.2167			Giesecke Bræer	Giesecke Bræer						GrIS
GGN0490	73.5932	-55.5306	Qeqertarsuup Sermia	Qeqertarssûp Sermia		Qeqertarsuup Sermia						GrIS
GGN0491	73.6179	-25.8849			Fangergletsjer	Fangergletsjer		RGI40-05.19632	G334011E73670N	-25.989	73.6703	LGIC
GGN0492	73.6667	-29.25			Ever Gletsjer	Ever Gletsjer						GrIS
GGN0493	73.6716	-25.3257			Spaltegletsjer	Spaltegletsjer		RGI40-05.19554	G334479E73647N	-25.5207	73.6466	LGIC
GGN0494	73.6833	-27.6333			Gerard de Geer Gletsjer	Gerard de Geer Gletsjer						GrIS
GGN0495	73.7037	-25.3958			Endeløs	Endeløs		RGI40-05.19556	G334259E73703N	-25.7412	73.7027	LGIC
GGN0496	73.7833	-26.2167			Knibtangen	Knibtangen		RGI40-05.19552	G333812E73731N	-26.1876	73.7307	LGIC
GGN0497	73.7833	-25.9667			Forhindringsgletsjer	Forhindringsgletsjer		RGI40-05.19647	G333995E73766N	-26.0053	73.766	LGIC
GGN0498	73.8317	-55.5825	Sermeq Kujalleq			Sermeq Kujalleq						GrIS
GGN0499	73.8568	-25.6713			Dukkegletsjer	Dukkegletsjer		RGI40-05.19700	G334202E73856N	-25.7979	73.8564	LGIC
GGN0500	73.9	-55.55			Ussing Bræer	Ussing Bræer						GrIS
GGN0501	73.9113	-25.0306			Søgletscher	Søgletscher		RGI40-05.19781	G335048E73943N	-24.9521	73.9434	LGIC
GGN0502	73.9167	-24.4167			Waltershausen Gletsjer	Waltershausen Gletsjer						GrIS
GGN0503	73.941	-55.7679	Sermeq Avanarleq			Sermeq Avanarleq						GrIS
GGN0504	73.95	-25.9333			Nunatakgletsjer	Nunatakgletsjer						GrIS
GGN0505	73.9833	-28.65			Skråbræ	Skråbræ						GrIS
GGN0506	73.9833	-28.0167			Hindringsgletsjer	Hindringsgletsjer						GrIS
GGN0507	73.9861	-22.6292			Fellenberg Gletsjer	Fellenberg Gletsjer		RGI40-05.19877	G337447E74002N	-22.553	74.0019	LGIC
GGN0508	74.0333	-26.75			Adolf Hoel Gletsjer	Adolf Hoel Gletsjer						GrIS
GGN0509	74.0333	-22.4167			A. Schmidt Gletsjer	A. Schmidt Gletsjer		RGI40-05.19869	G337558E74027N	-22.4421	74.0271	LGIC
GGN0510	74.0376	-22.6972			Rungstedgletsjer	Rungstedgletsjer		RGI40-05.19877	G337447E74002N	-22.553	74.0019	LGIC
GGN0511	74.0425	-22.5488			Haussmann Gletsjer	Haussmann Gletsjer		RGI40-05.19866	G337404E74038N	-22.5958	74.0384	LGIC
GGN0512	74.0492	-22.4873			Nippoldt Gletsjer	Nippoldt Gletsjer		RGI40-05.19875	G337497E74033N	-22.5033	74.0325	LGIC
GGN0513	74.0667	-25.6333			Dødehundebræ	Dødehundebræ						GrIS
GGN0514	74.1167	-27			Eyvind Fjeld Gletsjer	Eyvind Fjeld Gletsjer						GrIS
GGN0515	74.1831	-56.7513	Sermikassak	Sermikavsak		Sermikassak	Sermilikassak	RGI40-05.07403	G303259E74170N	-56.7412	74.1696	LGIC
GGN0516	74.1833	-21.15			Taggletsjer	Taggletsjer		RGI40-05.19936	G338832E74181N	-21.1685	74.1814	LGIC
GGN0517	74.2275	-23.4113			Irisgletsjer	Irisgletsjer						GrIS
GGN0518	74.2307	-55.8275	Ikissuup Sermersua	Ikigssûp Sermerssua	Cornell Gletsjer	Ikissuup Sermersua						GrIS
GGN0519	74.2333	-23.9167			Vibeke Gletsjer	Vibeke Gletsjer						GrIS
GGN0520	74.25	-23			Wordie Gletsjer	Wordie Gletsjer						GrIS
GGN0521	74.2667	-20.9167			Skillegletsjer	Skillegletsjer		RGI40-05.20002	G338999E74270N	-21.0009	74.27	LGIC
GGN0522	74.35	-25.55			Korsgletsjer	Korsgletsjer						GrIS
GGN0523	74.35	-22.9167			Grantagletsjer	Grantagletsjer						GrIS
GGN0524	74.3667	-20.9			Misteltengletsjer	Misteltengletsjer		RGI40-05.20026	G339105E74378N	-20.8954	74.3776	LGIC
GGN0525	74.37	-21.0219			Hødgletsjer	Hødgletsjer		RGI40-05.19973	G338940E74365N	-21.0599	74.3648	LGIC
GGN0526	74.3833	-20.8167			Frejagletsjer	Frejagletsjer		RGI40-05.20030	G339171E74378N	-20.8288	74.3778	LGIC
GGN0527	74.4	-24.2167			Vestre Vibeke Gletsjer	Vestre Vibeke Gletsjer						GrIS
GGN0528	74.4007	-21.0768			Balmunggletsjer	Balmunggletsjer		RGI40-05.19999	G338904E74401N	-21.0963	74.4006	LGIC
GGN0529	74.4167	-55.9666	Illullip Sermia	Igdlugdlip Sermia		Illullip Sermia						GrIS
GGN0530	74.6	-22.2667			Copeland Gletsjer	Copeland Gletsjer		RGI40-05.20038	G337563E74561N	-22.4373	74.561	LGIC
GGN0531	74.6232	-56.2193	Nunatakassaap Sermia	Nunatakavsaup Sermia		Nunatakassaap Sermia						GrIS
GGN0532	74.6333	-22.2667			Kløftgletsjer	Kløftgletsjer		RGI40-05.20042	G337651E74611N	-22.3489	74.6111	LGIC
GGN0533	74.6667	-22.1			Stejlgletsjer	Stejlgletsjer		RGI40-05.20097	G337922E74678N	-22.078	74.6779	LGIC
GGN0534	74.6833	-22.5833			Pasterze	Pasterze						GrIS
GGN0535	74.7	-22.4667			Grifgletsjer	Grifgletsjer						GrIS
GGN0536	74.7	-21.8			Trinity Gletsjer	Trinity Gletsjer		RGI40-05.20092	G338195E74672N	-21.8055	74.6719	LGIC
GGN0537	74.7167	-22			Barriere Gletsjer	Barriere Gletsjer		RGI40-05.20096	G338005E74703N	-21.9948	74.7027	LGIC
GGN0538	74.8667	-22.5			Tvegegletsjer	Tvegegletsjer						GrIS
GGN0539	74.9618	-57.0355	Tuttulikassaap Sermia		Hayes Gletsjer	Tuttulikassaap Sermia						GrIS
GGN0540	75.0996	-57.5723			Kjer Gletsjer	Kjer Gletsjer						GrIS
GGN0541	75.1596	-22.8267			Heinkel Gletsjer	Heinkel Gletsjer						GrIS
GGN0542	75.3167	-57.8333	Sermersuaq	Sermerssuaq	Steenstrup Gletsjer	Sermersuaq						GrIS
GGN0543	75.4531	-22.7266			Canongletsjer	Canongletsjer						GrIS
GGN0544	75.4582	-58.0637			Dietrichson Gletsjer	Dietrichson Gletsjer						GrIS
GGN0545	75.564	-22.6295			Stejlgletsjer	Stejlgletsjer						GrIS
GGN0546	75.6195	-57.9704			Sverdrup Gletsjer	Sverdrup Gletsjer						GrIS
GGN0547	75.6833	-22.75			Stormgletsjer	Stormgletsjer						GrIS
GGN0548	75.6833	-22.5			Ejnar Mikkelsen Gletsjer	Ejnar Mikkelsen Gletsjer						GrIS
GGN0549	75.7759	-58.8283			Nansen Gletsjer	Nansen Gletsjer						GrIS
GGN0550	75.8248	-59.0399			Nordenskiöld Gletsjer	Nordenskiöld Gletsjer						GrIS
GGN0551	75.9394	-66.5167	Sermipaluk	Sermipaluk		Sermipaluk	Hermipaluk	RGI40-05.07597	G293495E75933N	-66.5047	75.9332	LGIC
GGN0552	75.9876	-22.3788			Lillegletsjer	Lillegletsjer						GrIS
GGN0553	75.989	-59.8575	Nuussuup Sermia	Nûgssûp Sermia	Kong Oscar Gletsjer	Nuussuup Sermia						GrIS
GGN0554	76.0167	-23.3			L. Bistrup Bræ	L. Bistrup Bræ						GrIS
GGN0555	76.0473	-65.5518	Sermipaluk	Sermipaluk		Sermipaluk	Hermipaluk	RGI40-05.07624	G294491E76127N	-65.5086	76.1267	LGIC
GGN0556	76.0655	-65.6468	Kumaat Sermiat			Kumaat Sermiat	Kumait Hermiat	RGI40-05.07624	G294491E76127N	-65.5086	76.1267	LGIC
GGN0557	76.0667	-60.6333	Issuusarsuit Sermiat	Igssûssarssuit Sermiat		Issuusarsuit Sermiat						GrIS
GGN0558	76.0912	-68.2097	Appakkooriaq	Sermipaluk		Appakkooriaq	Sermipaluk	RGI40-05.07697	G291951E76111N	-68.0489	76.111	LGIC
GGN0559	76.0941	-67.7789	Nasersorfik	Nagssersorfik		Nasersorfik	Nassersorfik; Naherhorvik	RGI40-05.07787	G292660E76080N	-67.3399	76.0797	LGIC
GGN0560	76.1167	-60.3999			Peary Gletsjer	Peary Gletsjer						GrIS
GGN0561	76.15	-24.5			A.B. Drachmann Gletsjer	A.B. Drachmann Gletsjer						GrIS
GGN0562	76.1555	-68.2844			Neptune Gletsjer	Neptune Gletsjer		RGI40-05.07715	G291776E76147N	-68.2244	76.1474	LGIC
GGN0563	76.1667	-21.9167			Soranerbræen	Soranerbræen						GrIS
GGN0564	76.1741	-68.3171			Cluett Gletsjer	Cluett Gletsjer		RGI40-05.07722	G291761E76185N	-68.2394	76.1848	LGIC
GGN0565	76.2	-26.1167			Metaforgletsjer	Metaforgletsjer						GrIS
GGN0566	76.2	-25.5			Ebbe Gletsjer	Ebbe Gletsjer						GrIS
GGN0567	76.2167	-60.9999			Rink Gletsjer	Rink Gletsjer						GrIS
GGN0568	76.2397	-65.2432	Savissuup Sermia		Savigssuaq Gletscher	Savissuup Sermia	Savissuaq Gletscher					GrIS
GGN0569	76.2533	-64.8682			Helland Gletsjer	Helland Gletsjer						GrIS
GGN0570	76.2667	-63.7998	Appaliarsulipaluup Sermia	Agpaliarssulipalûp Sermia	Mohn Gletsjer	Appaliarsulipaluup Sermia	Appaliarrulipaluup Hermia	RGI40-05.07600	G296228E76253N	-63.7722	76.2525	LGIC
GGN0571	76.2774	-68.5855	Paakitsup Sermersua	Pâkitsup Sermerssua	Pituffik Gletsjer	Paakitsup Sermersua	Paakitsup Hermerrianga	RGI40-05.07736	G291713E76310N	-68.2868	76.3096	LGIC
GGN0572	76.3	-61.7666	Qeqertat Timaanni Sermeq		Döcker Smith Gletsjer	Qeqertat Timaanni Sermeq	Qikertat Timaani Sermeq					GrIS
GGN0573	76.3167	-62.4999			Morell Gletsjer	Morell Gletsjer						GrIS
GGN0574	76.3195	-24.9938			Budolfi Isstrøm	Budolfi Isstrøm						GrIS
GGN0575	76.3334	-64.0831			Yngvar Nielsen Gletsjer	Yngvar Nielsen Gletsjer						GrIS
GGN0576	76.3833	-62.7665	Innaqqissorsuup Oqquani Sermeq		Gade Gletsjer	Innaqqissorsuup Oqquani Sermeq						GrIS
GGN0577	76.4256	-24.1076			Ejnar Gletsjer	Ejnar Gletsjer						GrIS
GGN0578	76.4873	-25.0504			Pony Gletsjer	Pony Gletsjer						GrIS
GGN0579	76.5001	-68.2366			Store Landgletsjer	Store Landgletsjer		RGI40-05.07772	G291955E76463N	-68.0454	76.463	LGIC
GGN0580	76.5371	-24.7491			Kursbræ	Kursbræ		RGI40-05.09342	G335213E76547N	-24.7875	76.5465	LGIC
GGN0581	76.5797	-67.626	Ullip Sermia	Uvdlip Sermerssuaq	Harald Moltke Bræ	Ullip Sermia	Sermersuaq; Nunatarruup Hermia					GrIS
GGN0582	76.6333	-22.6667			Bredebræ	Bredebræ						GrIS
GGN0583	76.65	-24.1333			Borgjøkel	Borgjøkel						GrIS
GGN0584	76.6988	-67.0432			Søndre Tvillinggletsjer	Søndre Tvillinggletsjer						GrIS
GGN0585	76.719	-68.4795	Naajat Sermiat	Naujat Sermiat	Chamberlin Gletsjer	Naajat Sermiat		RGI40-05.08057	G291497E76805N	-68.5028	76.8049	LGIC
GGN0586	76.7229	-68.6739	Pinguarsuit Sermiat	Pinguarssuit Sermiat	Salisbury Gletsjer	Pinguarsuit Sermiat		RGI40-05.08057	G291497E76805N	-68.5028	76.8049	LGIC
GGN0587	76.7275	-67.0014			Nordre Tvillinggletsjer	Nordre Tvillinggletsjer						GrIS
GGN0588	76.7578	-67.7971	Equutissaatsut Sermiat	Eqûtigssaitsut Sermiat	Knud Rasmussen Gletsjer	Equutissaatsut Sermiat		RGI40-05.08054	G292408E76864N	-67.5921	76.8639	LGIC
GGN0589	76.773	-67.0206			Rampen	Rampen						GrIS
GGN0590	76.8303	-66.8866			Tunnelgletsjer	Tunnelgletsjer		RGI40-05.07857	G293108E76832N	-66.8925	76.8319	LGIC
GGN0591	76.8413	-67.2557			Hundetunge Gletsjer	Hundetunge Gletsjer		RGI40-05.08054	G292408E76864N	-67.5921	76.8639	LGIC
GGN0592	76.85	-24.7667			Trefork Gletsjer	Trefork Gletsjer						GrIS
GGN0593	76.85	-66.8329			Skjulgletsjer	Skjulgletsjer						GrIS
GGN0594	76.8887	-70.1684			Witzansky Gletsjer	Witzansky Gletsjer		RGI40-05.08052	G289786E76905N	-70.2139	76.9054	LGIC
GGN0595	76.9406	-70.0698			Ivar Berendsen Gletsjer	Ivar Berendsen Gletsjer		RGI40-05.08048	G289856E76945N	-70.1436	76.9445	LGIC
GGN0596	76.9833	-25.1333			Admiralty Gletsjer	Admiralty Gletsjer						GrIS
GGN0597	76.9876	-70.9062	Sermipaluk	Sermipaluk		Sermipaluk		RGI40-05.08044	G289231E77041N	-70.7686	77.0406	LGIC
GGN0598	77.0607	-69.4712			Berlingske Bræ	Berlingske Bræ		RGI40-05.08033	G290557E77062N	-69.4434	77.0621	LGIC
GGN0599	77.0667	-22.7667			Storstrømmen	Storstrømmen						GrIS
GGN0600	77.0801	-66.2232	Sermiarsupaluk	Sermiarssupaluk		Sermiarsupaluk						GrIS
GGN0601	77.0825	-24.6629			Admiralty Gletsjer	Admiralty Gletsjer						GrIS
GGN0602	77.0875	-24.169			Gultop Gletsjer	Gultop Gletsjer						GrIS
GGN0603	77.1167	-25.1667			Sunderland Gletsjer	Sunderland Gletsjer						GrIS
GGN0604	77.1167	-22.0833			Sælsøgletsjer	Sælsøgletsjer						GrIS
GGN0605	77.1299	-70.7566			Tyndall Gletsjer	Tyndall Gletsjer		RGI40-05.08042	G289278E77092N	-70.7216	77.0922	LGIC
GGN0606	77.1602	-69.6024	Itillersuaq	Itivdlerssuaq	Politiken Bræ	Itillersuaq	Itutterriaq	RGI40-05.08024	G290425E77172N	-69.5747	77.1722	LGIC
GGN0607	77.1858	-69.2548	Sermiarsupaluk	Sermiarssupaluk	Savage Gletsjer	Sermiarsupaluk		RGI40-05.08065	G290678E77156N	-69.3221	77.1557	LGIC
GGN0608	77.2065	-70.4837	Sermipaluk			Sermipaluk	Hermipaluk	RGI40-05.08013	G289533E77202N	-70.4671	77.2021	LGIC
GGN0609	77.2069	-66.0029	Kangerluarsorujussuup Qinngua	Kangerdluarssûp Qíngua	Marie Gletsjer	Kangerluarsorujussuup Qinngua	Kangerluarsuup Qinngua; Kangertuarrurujussuup Qinngua; Marie Bræ; Marre Gletscher					GrIS
GGN0610	77.2167	-24.9833			Hasting Gletsjer	Hasting Gletsjer						GrIS
GGN0611	77.2223	-69.7298	Sermiarsussuaq			Sermiarsussuaq		RGI40-05.08022	G290260E77195N	-69.7401	77.1949	LGIC
GGN0612	77.2322	-24.3124			Britannia Gletsjer	Britannia Gletsjer						GrIS
GGN0613	77.2345	-65.3164			Academy Gletsjer	Academy Gletsjer						GrIS
GGN0614	77.2353	-70.1452	Misuumasoq	Misûmassoq		Misuumasoq		RGI40-05.08020	G289879E77222N	-70.121	77.2217	LGIC
GGN0615	77.25	-20.7834			Søgletsjer	Søgletsjer		RGI40-05.09558	G339406E77225N	-20.5943	77.2248	LGIC
GGN0616	77.2562	-65.977			Leidy Gletsjer	Leidy Gletsjer						GrIS
GGN0617	77.3403	-71.6945	Qassisallip Sermia		Kiatak Gletsjer	Qassisallip Sermia	Qaggihattup Hermia	RGI40-05.08136	G288274E77340N	-71.7262	77.3404	LGIC
GGN0618	77.3618	-67.9872	Siunnaatalik	Siúnautalik	Hurlbut Gletsjer	Siunnaatalik		RGI40-05.07854	G292196E77316N	-67.8041	77.3161	LGIC
GGN0619	77.3667	-24.4167			Suzanne Bræ	Suzanne Bræ						GrIS
GGN0620	77.3783	-72.2667	Ujarasussuarsuit Itilliat			Ujarasussuarsuit Itilliat	Ujarahuhhuarruit Itivtiat	RGI40-05.08122	G287724E77384N	-72.2758	77.3838	LGIC
GGN0621	77.3933	-71.6583	Sermiarsussuaq	Sermiarssugssuaq		Sermiarsussuaq		RGI40-05.08129	G288260E77381N	-71.7403	77.3809	LGIC
GGN0622	77.4072	-71.8968	Marnit Sermiat		Robins Gletsjer	Marnit Sermiat	Marnit Hermiat	RGI40-05.08119	G288095E77402N	-71.9053	77.4022	LGIC
GGN0623	77.4072	-72.4525	Qangattaat Sermiat	Sermiarssupaluk	Vestgletsjer	Qangattaat Sermiat	Sermiarsupaluk; Qangattait Hermiat Appaarruit Timaanni	RGI40-05.08117	G287589E77408N	-72.4112	77.4077	LGIC
GGN0624	77.4199	-72.0338	Ujaassuup Sermia	Ujâgsup Sermia	Parish Gletsjer	Ujaassuup Sermia	Ujaassup Sermia; Ujaagguup Hermia	RGI40-05.08118	G287929E77398N	-72.0713	77.3982	LGIC
GGN0625	77.4312	-70.4834	Sermiarsupaluk			Sermiarsupaluk	Hermiarrupaluk	RGI40-05.08083	G289336E77433N	-70.6638	77.4327	LGIC
GGN0626	77.4323	-72.2135	Upernavissuup Sermia	Upernavigssûp Sermia	Kissel Gletsjer	Upernavissuup Sermia	Upernavigguup Hermia	RGI40-05.08116	G287782E77421N	-72.2179	77.421	LGIC
GGN0627	77.4494	-70.6344	Sermiarsussuaq			Sermiarsussuaq	Hermiarrurruaq	RGI40-05.08083	G289336E77433N	-70.6638	77.4327	LGIC
GGN0628	77.4999	-69.1936			Qaanaaq Gletsjer	Qaanaaq Gletsjer		RGI40-05.08005	G290838E77522N	-69.1616	77.5223	LGIC
GGN0629	77.5	-21.8667			Kofoed-Hansen Bræ	Kofoed-Hansen Bræ						GrIS
GGN0630	77.5009	-68.7533	Sermiarsupaluk	Sermiarssupaluk		Sermiarsupaluk	Hermiarrupaluk	RGI40-05.08110	G291039E77514N	-68.9608	77.5141	LGIC
GGN0631	77.5167	-65.6664	Qaqujaarsuup Sermia	Qaqujârssûp Sermia	Heilprin Gletsjer	Qaqujaarsuup Sermia						GrIS
GGN0632	77.5257	-69.3009			Bryant Gletsjer	Bryant Gletsjer		RGI40-05.08005	G290838E77522N	-69.1616	77.5223	LGIC
GGN0633	77.5262	-68.6944			Twin Gletsjer	Twin Gletsjer		RGI40-05.08109	G291280E77528N	-68.7202	77.528	LGIC
GGN0634	77.5602	-68.7785			Sydgletsjer	Sydgletsjer		RGI40-05.08108	G291022E77560N	-68.9777	77.5597	LGIC
GGN0635	77.5629	-69.6524			Fan Gletsjer	Fan Gletsjer		RGI40-05.08106	G290534E77581N	-69.4664	77.5808	LGIC
GGN0636	77.5764	-68.2681			Østgletsjer	Østgletsjer		RGI40-05.08063	G291817E77564N	-68.1827	77.5639	LGIC
GGN0637	77.6025	-67.7419	Quinisut Sermiat	Quinissut Sermiat	Hubbard Gletsjer	Quinisut Sermiat	Quinnisut Sermiat					GrIS
GGN0638	77.6059	-68.7698	Sermiarsupaluk	Sermiarssupaluk	Gnom Gletsjer	Sermiarsupaluk	Hermiarrupaluk	RGI40-05.08104	G291169E77605N	-68.8314	77.605	LGIC
GGN0639	77.6167	-68.1828			Gable Gletsjer	Gable Gletsjer						GrIS
GGN0640	77.636	-68.9673	Qaqortap Sermia		Qaqortaq Gletscher	Qaqortap Sermia		RGI40-05.08103	G290914E77601N	-69.0859	77.601	LGIC
GGN0641	77.6545	-69.4092			Scarlet Heart Gletsjer	Scarlet Heart Gletsjer		RGI40-05.08095	G290628E77632N	-69.3719	77.6324	LGIC
GGN0642	77.6564	-65.9679	Qeqertaarsuusarsuup Sermia	Qeqertârssûssarssûp Sermia	Tracy Gletsjer	Qeqertaarsuusarsuup Sermia						GrIS
GGN0643	77.6777	-68.3207			Mirror Gletsjer	Mirror Gletsjer						GrIS
GGN0644	77.6934	-68.5829	Kangerluarsuup Sermia		Bowdoin Gletsjer	Kangerluarsuup Sermia						GrIS
GGN0645	77.6991	-67.1759	Paarnarsuit Sermiat		Hart Gletsjer	Paarnarsuit Sermiat						GrIS
GGN0646	77.7	-66.233	Tuttulipaluup Sermia		Farquhar Gletsjer	Tuttulipaluup Sermia						GrIS
GGN0647	77.7167	-66.9496	Toornaarsulissuup Sermii		Sharp Gletsjer	Toornaarsulissuup Sermii						GrIS
GGN0648	77.7315	-66.6444	Toornaarsulissuup Sermii		Melville Gletsjer	Toornaarsulissuup Sermii						GrIS
GGN0649	77.7336	-68.3524			East Branch Gletsjer	East Branch Gletsjer						GrIS
GGN0650	77.7337	-68.7931	Tuttu Gletsjer		Tugto Gletscher	Tuttu Gletsjer						GrIS
GGN0651	77.779	-69.4287	Iterlassuup Sermia	Iterdlagssûp Qíngua	Sun Gletsjer	Iterlassuup Sermia	Iterlassuup Qinngua; Itertagguup Sermia					GrIS
GGN0652	77.8108	-70.9613	Naajaat Sermiat		Illuluarsuit Gletsjer	Naajaat Sermiat	Naujaat Sermiat	RGI40-05.08191	G289065E77823N	-70.9353	77.823	LGIC
GGN0653	77.8378	-71.1813	Sermiarsupaluk	Sermiarssupaluk		Sermiarsupaluk		RGI40-05.08188	G288897E77833N	-71.1034	77.8329	LGIC
GGN0654	77.854	-70.6716	Siorarsuit Sermiat		Siorarsuaq Gletsjer	Siorarsuit Sermiat		RGI40-05.08182	G289359E77848N	-70.6412	77.8478	LGIC
GGN0655	77.8757	-69.8513	Qinnguata Sermia	Siorapalûp Qíngua	Verhoeff Gletsjer	Qinnguata Sermia	Siorapaluup Qinngua					GrIS
GGN0656	77.88	-70.2973	Ikernup Sermia	Ikernup Sermia	Meehan Gletsjer	Ikernup Sermia						GrIS
GGN0657	77.907	-71.0812	Neqip Sermia	Neqip Sermia	Morris Jesup Gletsjer	Neqip Sermia						GrIS
GGN0658	77.9475	-71.8501	Arfalluarfiup Sermia	Pitorâviup Sermia	Clements Markham Gletsjer	Arfalluarfiup Sermia	Pitoraaviup Sermia					GrIS
GGN0659	77.9521	-71.5907	Arfalluarfiup Sermia	Arfagdluarfiup Sermia	Diebitsch Gletsjer	Arfalluarfiup Sermia	Neqip Illuata Sermia					GrIS
GGN0660	78.0224	-72.1669			Bamse Gletsjer	Bamse Gletsjer						GrIS
GGN0661	78.0598	-72.2383			Bu Gletsjer	Bu Gletsjer						GrIS
GGN0662	78.0717	-72.4301	Itutterriaq		Child Gletsjer	Itutterriaq						GrIS
GGN0663	78.1415	-72.7544			Storm Gletsjer	Storm Gletsjer						GrIS
GGN0664	78.1537	-72.6797	Itilliarsuk	Itivdliarssuk		Itilliarsuk						GrIS
GGN0665	78.1761	-72.6796			Dodge Gletsjer	Dodge Gletsjer						GrIS
GGN0666	78.2833	-21.5833			Blæsebræ	Blæsebræ						GrIS
GGN0667	78.2834	-72.2654			Brother John Gletsjer	Brother John Gletsjer						GrIS
GGN0668	78.6778	-21.4834			Gammel Hellerup Gletsjer	Gammel Hellerup Gletsjer						GrIS
GGN0669	78.8203	-67.0518			Hiawatha Gletsjer	Hiawatha Gletsjer						GrIS
GGN0670	78.9333	-21			Zachariae Isstrøm	Zachariae Isstrøm						GrIS
GGN0671	79.4462	-63.3957	Sermersuaq	Sermerssuaq	Humboldt Gletsjer	Sermersuaq						GrIS
GGN0672	79.7113	-20.2928			Spaltegletsjer	Spaltegletsjer						GrIS
GGN0673	80.2059	-16.8321			Depotgletsjer	Depotgletsjer		RGI40-05.09997	G343249E80231N	-16.7508	80.2313	LGIC
GGN0674	80.2224	-16.6659			Mallemukgletsjer	Mallemukgletsjer		RGI40-05.09997	G343249E80231N	-16.7508	80.2313	LGIC
GGN0675	80.3167	-19.9			Aage Bertelsen Gletsjer	Aage Bertelsen Gletsjer		RGI40-05.09937	G339749E80313N	-20.2507	80.3125	LGIC
GGN0676	80.4605	-16.6279			Mågegletsjer	Mågegletsjer		RGI40-05.09992	G343355E80425N	-16.6451	80.4253	LGIC
GGN0677	80.4951	-18.94			Brede Spærregletsjer	Brede Spærregletsjer		RGI40-05.09915	G340801E80458N	-19.1988	80.4576	LGIC
GGN0678	80.5712	-19.3767			Dråbegletsjer	Dråbegletsjer		RGI40-05.09919	G340571E80575N	-19.429	80.5754	LGIC
GGN0679	80.5833	-60.05			Petermann Gletsjer	Petermann Gletsjer						GrIS
GGN0680	80.6176	-18.072			Bjørnegletsjer	Bjørnegletsjer		RGI40-05.10324	G341927E80608N	-18.0728	80.6077	LGIC
GGN0681	80.6336	-18.6443			Smalle Spærregletsjer	Smalle Spærregletsjer		RGI40-05.10352	G341418E80693N	-18.582	80.6934	LGIC
GGN0682	80.6742	-19.4168			Hjørnegletsjer	Hjørnegletsjer		RGI40-05.10347	G340822E80748N	-19.1776	80.7481	LGIC
GGN0683	80.7171	-59.2811			Porsild Gletsjer	Porsild Gletsjer						GrIS
GGN0684	80.7622	-17.473			Tobias Gletsjer	Tobias Gletsjer		RGI40-05.10361	G341865E80809N	-18.1354	80.8087	LGIC
GGN0685	80.8179	-60.0525			Sigurd Berg Gletsjer	Sigurd Berg Gletsjer						GrIS
GGN0686	80.8651	-61.7795			Cecil Gletsjer	Cecil Gletsjer		RGI40-05.08445	G297905E80883N	-62.095	80.8825	LGIC
GGN0687	80.9504	-61.8693			Faith Gletsjer	Faith Gletsjer		RGI40-05.08443	G297605E81009N	-62.395	81.0091	LGIC
GGN0688	80.9835	-60.6321			Hubert Gletsjer	Hubert Gletsjer						GrIS
GGN0689	81.0404	-60.8206			Belgrave Gletsjer	Belgrave Gletsjer						GrIS
GGN0690	81.058	-62.19			Edith Gletsjer	Edith Gletsjer		RGI40-05.08443	G297605E81009N	-62.395	81.0091	LGIC
GGN0691	81.0778	-62.4186			Constance Gletsjer	Constance Gletsjer	Constance Gletscher	RGI40-05.08443	G297605E81009N	-62.395	81.0091	LGIC
GGN0692	81.3333	-16.9667			Marsk Stig Bræ	Marsk Stig Bræ		RGI40-05.10315	G344790E81287N	-15.2101	81.2869	LGIC
GGN0693	81.3833	-54.0333			Steensby Gletsjer	Steensby Gletsjer						GrIS
GGN0694	81.45	-27.35			Hagen Bræ	Hagen Bræ						GrIS
GGN0695	81.5333	-14.7334			Flade Isblink	Flade Isblink		RGI40-05.10315	G344790E81287N	-15.2101	81.2869	LGIC
GGN0696	81.5449	-45.3668			C.H. Ostenfeld Gletsjer	C.H. Ostenfeld Gletsjer						GrIS
GGN0697	81.55	-50.25			Ryder Gletsjer	Ryder Gletsjer						GrIS
GGN0698	81.5667	-32.25			Academy GGletsjer	Academy GGletsjer						GrIS
GGN0699	81.7333	-35.6667			Nyeboe Gletsjer	Nyeboe Gletsjer						GrIS
GGN0700	81.7742	-44.445			Harder Gletsjer	Harder Gletsjer						GrIS
GGN0701	81.7833	-34.5			Marie Sophie Gletsjer	Marie Sophie Gletsjer						GrIS
GGN0702	81.9	-36			Hobbs Gletsjer	Hobbs Gletsjer						GrIS
GGN0703	81.9167	-29.1667			Hestetunge Bræ	Hestetunge Bræ		RGI40-05.10312	G331215E81911N	-28.7849	81.9112	LGIC
GGN0704	81.95	-29.1333			Hugh Lee Bræ	Hugh Lee Bræ		RGI40-05.10312	G331215E81911N	-28.7849	81.9112	LGIC
GGN0705	81.95	-28.7833			Josephine Bræ	Josephine Bræ		RGI40-05.10312	G331215E81911N	-28.7849	81.9112	LGIC
GGN0706	82.1167	-38.6667			Astrup Bræ	Astrup Bræ						GrIS
GGN0707	82.1262	-42.6552			Jungersen Gletsjer	Jungersen Gletsjer						GrIS
GGN0708	82.2021	-39.9639			Adams Gletsjer	Adams Gletsjer						GrIS
GGN0709	82.2459	-40.7836			Ekspedition Bræ	Ekspedition Bræ	Henson Gletsjer					GrIS
GGN0710	82.4833	-40.3333			Inukitsaq Gletsjer	Inukitsaq Gletsjer		RGI40-05.10755	G319949E82483N	-40.0514	82.4827	LGIC
GGN0711	82.5542	-40.3068			Aajaku Gletsjer	Aajaku Gletsjer		RGI40-05.10736	G320012E82531N	-39.988	82.5309	LGIC
GGN0712	82.5647	-38.8078			Persuaq Gletsjer	Persuaq Gletsjer		RGI40-05.10748	G321124E82566N	-38.8762	82.5656	LGIC
GGN0713	82.6333	-36.3333			Ymer Gletsjer	Ymer Gletsjer		RGI40-05.10747	G323244E82655N	-36.7557	82.6546	LGIC
GGN0714	82.6833	-39.4167			Lurgletscher	Lurgletscher		RGI40-05.10748	G321124E82566N	-38.8762	82.5656	LGIC
GGN0715	82.7937	-38.5			Tjalfe Gletsjer	Tjalfe Gletsjer		RGI40-05.10749	G322065E82674N	-37.9353	82.6735	LGIC
GGN0716	82.9	-35.3333			Sleipner Bræ	Sleipner Bræ		RGI40-05.10683	G324663E82878N	-35.3367	82.8783	LGIC
GGN0717	82.9119	-31.9207			Balder Gletsjer	Balder Gletsjer		RGI40-05.10862	G328441E82854N	-31.5587	82.854	LGIC
GGN0718	83.0178	-45.369			Buys-Ballot Gletsjer	Buys-Ballot Gletsjer		RGI40-05.10607	G314965E83009N	-45.0348	83.0089	LGIC
GGN0719	83.0594	-31.058			Gefion Bræ	Gefion Bræ		RGI40-05.10844	G329178E83012N	-30.8218	83.0117	LGIC
GGN0720	83.1638	-36.9626			Dreng Bræ	Dreng Bræ		RGI40-05.10988	G322874E83240N	-37.1259	83.2401	LGIC
GGN0721	83.2333	-33.3333			Sif Gletsjer	Sif Gletsjer		RGI40-05.10893	G326894E83267N	-33.1058	83.2673	LGIC
GGN0722	83.2714	-33.9225			Nysne Gletsjer	Nysne Gletsjer		RGI40-05.11024	G326293E83301N	-33.7075	83.3008	LGIC
GGN0723	83.3165	-28.4146			Ydun Gletsjer	Ydun Gletsjer		RGI40-05.11042	G331745E83306N	-28.2549	83.3059	LGIC
GGN0724	83.3167	-34.25			Sydgletsjer	Sydgletsjer		RGI40-05.10959	G325843E83366N	-34.1573	83.3658	LGIC
GGN0725	83.3232	-34.5818			Modvindgletsjer	Modvindgletsjer		RGI40-05.10959	G325843E83366N	-34.1573	83.3658	LGIC
GGN0726	83.3633	-38.5602			Thomas Gletsjer	Thomas Gletsjer		RGI40-05.10957	G321679E83360N	-38.3207	83.3603	LGIC
GGN0727	83.3863	-34.2573			Malcantone Gletsjer	Malcantone Gletsjer		RGI40-05.10959	G325843E83366N	-34.1573	83.3658	LGIC
GGN0728	83.4091	-29.604			Borup Gletsjer	Borup Gletsjer		RGI40-05.11037	G330072E83405N	-29.9281	83.4054	LGIC
GGN0729	83.4213	-36.7822			A. Harmsworth Gletsjer	A. Harmsworth Gletsjer		RGI40-05.11001	G323832E83396N	-36.1684	83.3962	LGIC
GGN0730	83.4376	-28.502			Moore Gletsjer	Moore Gletsjer		RGI40-05.11026	G331489E83400N	-28.5111	83.4004	LGIC
GGN0731	83.45	-34.3333			MacMillan Gletsjer	MacMillan Gletsjer		RGI40-05.10889	G325659E83447N	-34.3414	83.4473	LGIC
GGN0732	83.4532	-27.6277			Bertelsen Gletsjer	Bertelsen Gletsjer		RGI40-05.11025	G332052E83445N	-27.9484	83.4452	LGIC
GGN0733	83.4589	-34.7222			Nordgletsjer	Nordgletsjer		RGI40-05.10887	G325109E83418N	-34.8915	83.4182	LGIC
