# Supplementary material for: Brief communication: Getting Greenland's glaciers right – a new data set of all official Greenlandic glacier names
Source: Copernicus journal article supplement (doi:10.5194/tc-9-2215-2015), 2015-12-01
Supplement: Supplementary file 1 [file tc-9-2215-2015-supplement.zip]

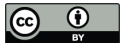

## *Supplement of*

# **Brief communication: Getting Greenland's glaciers right – a new data set of all official Greenlandic glacier names**

**A. A. Bjørk et al.**

*Correspondence to:* A. A. Bjørk ([andersb@snm.ku.dk](mailto:andersb@snm.ku.dk))

- [tc-9-2215-2015-supplement-title-page.pdf](#)
- [GreenlandGlacierNames\\_GGNv01.csv](#)
- [GreenlandGlacierNames\\_GGNv01.kmz](#)
- [GreenlandGlacierNames\\_GGNv01.xlsx](#)
- [GreenlandGlacierNames\\_GGNv01\\_WGS84.dbf](#)
- [GreenlandGlacierNames\\_GGNv01\\_WGS84.lyr](#)
- [GreenlandGlacierNames\\_GGNv01\\_WGS84.prj](#)
- [GreenlandGlacierNames\\_GGNv01\\_WGS84.sbn](#)
- [GreenlandGlacierNames\\_GGNv01\\_WGS84.sbx](#)
- [GreenlandGlacierNames\\_GGNv01\\_WGS84.shp](#)
- [GreenlandGlacierNames\\_GGNv01\\_WGS84.shx](#)

The copyright of individual parts of the supplement might differ from the CC-BY 3.0 licence.
